# Supplementary material for: Association of gender and metabolic factors with thyroid nodules in T2DM: a retrospective study
Source: PeerJ. 2025 Mar 26;13:e19068. doi: 10.7717/peerj.19068 (PMC11954462; doi:10.7717/peerj.19068)
Supplement: Supplemental Information 2 [file peerj-13-19068-s002.xlsx]

## Sheet: Sheet1
Thyroid nodule	Age	Smoking	Drinking	DM coure	ASCVD	History of DM	SBP(mmHg)	DBP(mmHg)	Metformin	Insulin	HbA1c (%)	eGFR (mL/min/1.73 m2)	TC(mmol/L)	TG(mmol/L)	HDLC(mmol/L)	LDLC(mmol/L)	FT3	FT4	TSH	UA	Height（cm）	Weight	BMI (Body Mass Index)	PBF (Percent Body Fat)	WHR (Waist-Hip Ratio)	SLM (Soft Lean Mass)	FFM (Fat Free Mass)	SMM (Skeletal Muscle Mass)	BFM (Body Fat Mass)	VFA (Visceral Fat Area)	AC (Arm Circumference)	AMC (Arm Muscle Circumference)
0	48	1	1	2	2	2	136	85	0	0	9.5	114.61	6.01	6.58	1.38	2.73	3.28	12.4	3.36	304	170	87.5	30.3	32.6	1.03	55.5	58.9	33.1	28.6	137.5	36.7	31.5
0	50	1	2	2	2	2	127	85	0	0	8.8	116.38	5.35	3.65	1	3.54	2.53	11.9	1.85	219	163	59.1	22.2	22.6	0.9	43.3	45.7	25.2	13.4	61.5	29.6	26.7
0	66	1	2	1	1	2	121	74	0	0	10.4	93.38	4.96	1.21	1.07	2.93	2.85	10.9	2.02	234	178	88.7	28	29.5	1	59	62.5	34.7	26.2	123.7	34.4	30
0	37	2	2	1	2	2	120	76	0	0	9.1	129.63	4.52	2.1	0.86	2.81	2.97	12.5	1.68	329	174	91.5	30.2	36.4	1.03	54.9	58.2	32.4	33.3	165.4	36.5	30.9
0	57	1	1	2	2	2	129	85	0	0	11.6	108.36	5.4	3.14	1.2	2.71	2.65	11.1	2.33	402	160	69	27	25.6	0.89	48.5	51.3	28.9	17.7	70.9	33.6	29.5
0	68	2	2	14	2	2	139	86	1	1	6.4	93.06	4.77	0.74	1.09	2.67	2.99	13.8	3.28	295	164	76	28.3	30.9	0.96	49.8	52.5	29.2	23.5	105.6	34.5	30.3
0	38	2	2	1	2	2	130	80	0	0	12.6	173.76	5.36	3	1.06	2.87	2.72	14.7	5.47	316	174	79.5	26.3	3	0.62	72.9	77.1	39.6	2.4	34.3	41.1	40.8
0	39	2	2	2	2	2	148	100	0	0	10	122.97	5.88	3.74	1.14	3.49	2.66	14.1	1.32	299	162	76.8	29.3	30.8	0.95	50.4	53.1	29.7	23.7	103.8	35.7	31.4
0	31	2	2	2	2	2	134	87	0	0	12	142.06	6.12	8.37	1.17	3.64	2.71	13.4	1.11	471	176	83.7	27	32.2	1.01	53.4	56.7	31.7	27	127.4	34.6	29.8
0	29	2	1	1	1	2	141	91	0	0	10.1	131.92	4.97	5.38	1.02	2.88	2.82	12.63	4.49	573	170	89.7	31	35.9	1	54.3	57.5	32.5	32.2	150.9	37.5	31.6
0	47	1	2	14	2	2	133	88	1	1	8.5	120.83	4.12	0.72	1.25	2.39	3.67	14.7	2.72	300	183	105	31.4	33.2	1	65.9	70.1	39.9	34.9	153.7	38	32
0	56	1	2	5	1	1	141	74	0	0	6.8	109.13	5.21	1.11	1.21	3.16	2.87	11.5	1.72	374	178	76.5	24.1	21.3	0.86	56.8	60.2	33.9	16.3	67.8	32	28.8
0	54	1	1	16	2	1	132	85	1	1	12.1	35.25	3.73	1.67	0.94	1.74	2.56	12	1.12	578	169	76.7	26.9	33	0.98	48.6	51.4	28	25.3	127.2	32.8	28.5
0	69	1	1	20	2	1	117	75	1	0	6.4	89.85	4.31	0.77	1.01	2.42	2.5	11.6	4.93	336	176	63.5	20.5	24.7	0.94	45.1	47.8	26.4	15.7	72.1	29	25.7
0	65	2	2	18	2	2	150	79	0	1	9.3	98.31	4.77	1.23	0.99	3.2	3.99	15.02	0.723	340	160	66.8	26.1	26.6	0.89	46.3	49	26.9	17.8	81.2	31.4	27.6
0	61	2	2	20	2	1	145	93	0	1	8.3	99.2	3.8	1.04	1.07	2.23	2.4	12.5	1.02	486	170	59.7	20.7	20	0.85	45.1	47.8	26.2	11.9	55	27.5	24.8
0	52	1	2	4	1	2	142	82	0	0	7	105.02	3.75	2.84	0.83	1.85	3.16	12.9	2.67	355	170	73.2	25.3	25	0.93	52.1	54.9	30.6	18.3	84.9	32.9	29.8
0	57	2	2	8	1	2	131	82	1	1	6.5	99.59	5.36	1.88	1.1	2.9	2.61	11.03	3.69	467	175	89.3	29.2	27.6	0.95	60.9	64.6	35.5	24.7	118.8	34	30
0	61	1	2	5	2	1	152	85	0	1	8.2	97.99	4.82	2.14	1.04	2.72	3.45	13	0.665	243	179	73.1	22.8	27.6	0.98	49.9	53	29.1	20.1	97.8	30.7	26.8
0	64	1	1	18	1	1	105	64	0	0	7.5	102.43	4.05	4.58	1.07	1.4	3.01	12.39	2.7	435	172	70.3	23.8	25.9	0.94	49.2	52.1	28.8	18.2	85.2	31.8	28.5
0	61	2	2	20	2	1	130	78	1	1	6.8	96.27	4.46	0.73	1.01	2.75	2.24	11.2	2.27	366	177	58.4	18.6	11.5	0.82	48.8	51.7	28.1	6.7	36	26.8	25.3
0	60	1	2	22	2	1	146	76	1	1	8.2	98.78	3.71	0.98	0.95	2	3.28	12.5	1.58	277	170	69	23.9	23.8	0.94	49.7	52.6	29.5	16.4	72.7	32.5	29.3
0	65	2	2	8	1	2	130	78	1	1	8	98.93	5.29	2.21	1.07	3.27	2.97	12.01	0.973	277	164	77.4	28.8	32.8	0.97	49.2	52	29	25.4	118	35.3	30.8
0	39	1	2	5	2	1	129	97	0	0	6.2	117.25	3.92	1.59	1.15	1.84	3.2	15.5	1.58	270	162	66.6	25.4	31	0.96	43.5	46	25.4	20.6	93.5	32	27.7
0	49	2	2	12	1	2	157	99	1	0	6.9	107.26	3.22	2.72	0.93	1.38	3.07	12.4	2.6	278	172	77.2	26.1	22.1	0.91	56.8	60.1	33.3	17.1	83.3	32.7	29.7
0	52	2	2	15	2	1	145	78	1	1	8.5	100.82	3.19	1.52	0.95	1.7	2.98	11.6	1.65	239	163	78.7	29.6	28.2	0.93	53.4	56.5	31.9	22.2	92.6	35.5	30.7
0	74	1	1	24	2	1	155	76	1	1	8.1	67.68	4.04	1.48	1.17	1.92	2.98	13.7	0.775	484	169	80.4	28.2	35.2	1.03	49.2	52.1	28.5	28.3	147.6	34.1	29.2
0	52	2	2	7	2	2	113	75	1	1	10.9	111.44	4.36	1.31	1.16	2.43	2.85	13.1	0.974	227	174	70.1	23.2	22.1	0.89	51.6	54.6	30.2	15.5	73.3	30.4	27.3
0	61	2	2	15	1	2	140	96	1	0	7.5	84.22	5.11	2.99	1.19	2.55	2.24	10.07	5.52	418	166	77.6	28.2	35.1	1.02	47.6	50.4	27.7	27.2	140.9	34.2	29.1
0	27	1	1	8	2	2	121	85	1	1	10.5	131.9	5.19	2.14	1.33	2.84	2.91	12.37	1.01	490	172	81.9	27.7	29.9	0.94	54.2	57.4	31.9	24.5	107.9	33.8	29.6
0	58	1	1	16	1	2	137	84	1	1	7.1	89.16	4.44	2.05	0.99	2.23	2.64	11.9	1.89	349	166.5	61.6	22.2	20.5	0.89	46.4	49	27.2	12.6	56.8	30	27.3
0	39	2	2	4	2	1	136	88	1	0	7.6	99.72	5.48	2.18	0.95	3.51	3.25	13.1	1.33	386	166	62.8	22.8	25.3	0.88	44.3	46.9	25.9	15.9	68	29.6	26.2
0	62	1	2	2	2	1	117	80	1	0	7	101.07	3.03	1.48	0.9	1.41	3.6	14	2.31	289	170	57.5	19.9	9.6	0.81	49.1	52	27.5	5.5	42.3	27.5	26.8
0	52	1	2	10	2	2	150	90	1	1	7.5	94.72	5.84	2.39	1.06	3.11	3.53	11.26	4.39	358.4	180	73.8	22.8	29.3	0.94	49.1	52.2	28.4	21.6	101.1	29.9	25.9
0	43	2	2	1	2	2	136	90	1	0	6.8	125.15	4.4	1.58	0.69	2.98	3.37	14.2	2.79	322	162	70.5	26.9	26.7	0.87	48.9	51.7	28.6	18.8	79.9	32.3	28.4
0	71	1	1	20	1	1	116	73	1	1	8.5	90.26	3.95	0.93	1.03	2.02	2.81	10.5	2.03	247	172	80.4	27.2	31.5	0.96	52	55.1	30.8	25.3	112	33.1	28.4
0	41	2	2	5	2	1	124	88	1	0	7.9	136.15	6.47	14.35	1.23	2.42	2.75	11.06	3.95	341	168	73.1	25.9	24.8	0.87	51.9	55	30.8	18.1	74.9	32.8	29.2
0	51	1	1	16	2	1	119	76	1	1	9	118.2	2.74	1.87	0.67	1.42	3.03	12.69	2.38	210	180	80.5	24.8	22.3	0.92	59.2	62.6	35	17.9	84.3	32.2	28.9
0	48	2	2	1	1	1	130	90	0	0	9.1	120.97	4.49	1.91	0.93	2.62	3.33	13.5	4.02	303	160	78.8	30.8	42.4	0.95	43	45.4	24.6	33.4	171.7	33.9	27.9
0	60	1	1	10	1	1	164	90	1	0	6.4	101.78	6.4	6.02	1.17	3.83	3.4	16.6	3.13	448	170	71.4	24.7	25.2	0.92	50.4	53.4	29.5	18	84.3	31.4	27.8
0	48	2	2	14	2	1	135	94	1	1	9.3	127.21	4	1.08	1.17	1.7	2.56	13.1	0.673	232	163	76.6	28.8	32.1	0.92	49.1	52	28.9	24.6	108.5	35.6	31.1
0	62	1	1	7	2	1	139	94	1	0	6.7	95.59	5.63	1.68	1.15	3.13	3.13	11.8	3.42	500	175	85.6	28	30	0.99	56.6	59.9	33.4	25.7	116.8	34.3	29.8
0	60	2	2	20	2	1	144	90	1	0	8.3	93.27	3.46	0.92	0.95	1.76	2.86	12.6	0.568	308	175	69.2	22.6	25	0.93	49	51.9	28.7	17.3	80.8	30.1	26.6
0	60	2	2	17	1	2	135	94	1	0	6.8	58.05	3.9	1.51	0.84	2.27	2.17	12.4	2.72	427	170	57.4	19.9	14.1	0.81	46.5	49.3	26.8	8.1	40.7	27.1	25.2
0	45	1	1	1	2	1	129	80	1	0	11.7	113.89	5.22	1.64	0.92	3.51	3.04	14.1	2.06	280	170	73.6	25.5	30	0.88	48.5	51.5	28.4	22.1	91.4	31	26.7
0	59	2	1	21	1	1	138	88	1	1	9.2	101.88	2.88	1.2	0.92	1.31	3.33	12.3	1.13	342	165	77.7	28.5	32.7	1	49.4	52.3	28.9	25.4	125.4	34.4	29.5
0	57	1	2	19	2	1	124	70	1	1	9.4	99.59	4.98	0.94	1.29	2.7	2.56	14.1	0.968	337	180	95.8	29.6	27.6	0.95	65.5	69.4	39.2	26.4	116.4	35.7	31.2
0	56	2	2	16	1	1	130	80	1	1	7.3	103.39	4.29	0.87	1.44	2.1	2.56	10.1	1.97	234	166	64.9	23.6	29.9	0.96	43	45.5	24.9	19.4	89.7	31	27.2
0	61	2	2	16	2	1	125	85	1	0	7.5	101.78	3.65	1.32	0.72	2.29	2.05	13.6	3.92	62	167	90.3	32.4	32.3	1.01	57.9	61.1	34.4	29.2	135.6	37.2	32.1
0	53	1	1	15	2	1	122	83	1	0	5.5	110.67	3.92	1.17	0.92	2.53	2.91	12.7	3.02	288	161	67.4	26	28	0.9	45.8	48.5	26.8	18.9	81.6	32.2	28.2
0	52	2	2	16	1	1	134	93	1	0	8.9	101.39	5.55	1.29	1.68	3.06	3.25	15.3	0.71	365	158	71.8	28.8	39	1.02	41.1	43.8	23.3	28	162.1	34	28.7
0	54	2	2	18	1	1	149	100	1	0	7.2	223.16	5.76	1.24	1.36	3.6	2.99	12.4	2.54	366	168	85.9	30.4	35.7	1.03	52.3	55.2	30	30.7	161.7	34.3	29.6
0	56	2	2	20	2	1	112	70	1	1	10.1	95.93	5.26	1.58	1.41	3.1	2.9	13	1.16	322	180	95.1	29.4	33.3	1.03	59.6	63.4	35.6	31.7	151.2	36.6	31.1
0	57	2	2	2	1	2	129	85	1	0	9	98.8	3.44	2.61	0.81	1.68	2.75	14.1	2.73	288.7	170	66.6	23	20.9	0.86	49.9	52.7	28.8	13.9	67.8	30.3	28
0	59	2	2	8	2	2	119	83	1	0	8	96.52	4.51	0.97	1.1	2.95	3.15	11.4	3.15	332	170	68.6	23.7	20.3	0.87	51.7	54.7	30.5	13.9	61.9	31.4	28.7
0	49	1	1	3	1	1	142	97	1	0	6.9	113.81	4.4	0.66	1.06	2.65	3.04	12.1	1.24	249	168	80.6	28.6	29	0.99	54.1	57.3	31.8	23.3	110.9	34.5	30.1
0	66	1	1	4	1	1	163	97	1	0	6.3	88.12	5.33	2.04	1.15	3.33	2.95	13.2	4.86	294	168	70	24.8	26.1	0.96	48.8	51.7	28.5	18.3	89.2	31.7	28
0	59	1	1	8	2	2	118	68	1	0	9.4	102.55	4.99	1.6	0.97	3.14	3.09	11.3	4.92	281	168	65.5	23.2	23.2	0.89	47.5	50.3	27.9	15.2	67.5	30.8	27.5
0	63	1	2	3	1	2	139	88	0	0	8.2	114.49	3.62	0.79	1.27	1.43	2.31	13	2.35	249	171	76.2	26.1	25.5	0.89	53.6	56.8	32	19.4	80.5	33	29
0	29	2	2	1	2	2	120	79	0	0	12.7	154.18	6.44	16.22	1.11	2.92	2.72	13.2	3.11	240	168	67.9	24.1	27.3	0.96	46.6	49.4	27.3	18.5	85.4	31.6	27.6
0	53	1	1	1	1	1	162	105	0	0	10.3	68.7	4.7	1.05	1.08	2.53	2.35	12.9	1.68	325	176	76.4	24.7	20.7	0.89	57.3	60.6	34	15.8	71.2	32.2	29.4
0	62	2	2	2	2	2	119	82	1	1	10.3	86.69	3.24	2.62	0.88	1.32	2.88	14.3	2.8	370	173	69.5	23.2	21.3	0.86	51.6	54.7	30.1	14.8	68.6	30.8	28.3
0	53	2	2	2	2	2	130	84	1	0	9	110.66	5.45	2.45	1	3.32	2.95	11.8	2.45	341	160	68.5	26.8	29.2	0.9	45.8	48.5	27	20	80.9	32.7	28.2
0	64	1	1	8	1	1	145	84	1	0	10.8	90.53	6.25	1.83	1.74	3.2	2.81	10.3	2.51	271	177	77.7	24.8	32.6	0.89	49.3	52.3	28.5	25.4	115	30.8	26.5
0	47	2	2	3	2	2	108	75	1	0	10.3	129.3	5.5	2.31	1.06	3.7	3.13	14.9	2.17	306	165	66.2	24.3	28	0.94	45	47.7	26.3	18.5	84	31.5	27.6
0	61	1	1	14	1	2	152	90	1	1	6.7	103.88	5.08	1.12	1.04	2.93	2.6	12.06	1.81	307	175	68.7	22.4	21.2	0.9	51.1	54.1	29.9	14.6	69.4	29.8	26.9
0	40	1	1	1	2	2	137	92	0	0	8.5	127.96	4.26	3.4	0.87	1.39	3.53	13.5	1.97	226	174.5	83.6	27.5	27.5	0.95	57.3	60.6	33.9	23	103.3	34.4	30.5
0	47	1	2	5	2	2	113	80	1	0	11.4	122.68	5.99	4.75	1.05	3.81	2.93	13.1	1.59	241	176	67.1	21.7	17.9	0.86	52	55.1	29.9	12	64.8	29.5	27.6
0	53	1	1	3	1	2	145	95	1	0	7.5	119.61	4.71	5.5	1.39	2.26	2.47	11.39	5.36	346	172	61.5	20.8	17.3	0.88	48.1	50.8	28.3	10.7	48.5	29.3	27.2
0	32	2	2	3	1	1	166	106	1	0	11.6	134.13	5.03	11.66	1.21	2.12	3.13	13.5	3.37	400	162	75.2	28.7	30.5	0.89	49.4	52.2	28.7	23	100.3	33.6	29.5
0	44	2	2	9	2	2	122	86	1	0	12.1	127.41	5.22	2.36	1.02	3.18	2.2	11.7	2.73	246	177	105.2	33.6	38.6	1.05	60.9	64.6	36.3	40.6	193.8	39	32.4
0	62	2	2	3	2	2	116	78	1	0	6.2	101.72	3.93	1.63	0.84	2.18	2.83	12	3.05	347	175	77.1	25.2	24.4	0.87	55.1	58.3	32.5	18.8	81.5	31.3	27.7
0	62	2	2	1	1	1	128	88	1	0	11.9	106.97	6.51	1.74	1.47	4.12	2.75	12.7	7.57	250	160	66.8	26.1	32	0.92	43	45.5	24.8	21.3	100.3	32.2	28
0	59	1	2	10	2	1	145	93	1	0	8.9	116.69	4.01	2.86	1.01	1.82	2.61	15	1.86	187	177	77.2	24.6	23.7	0.86	55.7	58.9	32.8	18.3	79.6	31.4	28.2
0	39	2	2	5	2	2	157	107	1	0	10.8	128.72	5.03	3.54	1.18	2.8	3.4	14.6	2.22	371	161	81.3	31.4	39.5	1.05	46.5	49.2	26.8	32.1	176.2	35.4	29.7
0	61	2	2	5	2	2	150	90	1	0	8.8	103.16	3.51	1.88	0.93	1.89	2.69	13.5	1.02	365	174	70.5	23.3	22.1	0.9	51.9	54.9	30.1	15.6	77.8	30.3	27.6
0	52	2	2	7	1	2	136	83	1	0	6.8	109.15	4.06	1.8	0.8	2.62	3.19	14.4	3.45	357	172	78.4	26.5	30	0.92	51.8	54.9	29.2	23.5	115.6	30.2	26.7
0	71	2	1	19	1	1	167	106	1	1	8.4	33.72	4.63	1.17	0.88	2.95	2.84	13.5	1.81	350	162	76.8	29.3	36.7	0.99	45.9	48.6	26.3	28.2	149.7	34.2	28.8
0	57	2	2	18	2	2	130	84	1	1	8.4	92.47	4.58	1.63	0.87	3.02	2.75	12.4	1.78	407	168	72.8	25.8	21.9	0.87	53.9	56.9	31.9	15.9	68.9	32.8	29.9
0	40	1	2	6	2	1	124	84	1	0	9.2	120.39	5.19	1.49	0.98	3.74	3.07	12.8	2.14	402	168	67.1	23.8	22.2	0.89	49.3	52.2	28.8	14.9	71	30.4	27.2
0	48	1	2	6	2	1	140	96	1	0	8.5	110.7	5.06	1.14	1.1	2.84	2.91	12.7	1.46	281	170	74.5	25.8	29.4	0.95	49.6	52.6	29	21.9	99.8	31.7	27.5
0	67	1	2	19	1	1	145	60	1	1	6.6	39.36	3.32	1.28	0.81	1.69	3.08	11.7	2.53	537.4	180	90	27.8	28.7	0.94	60.5	64.2	35.6	25.8	116.3	34.2	29.9
0	50	2	2	6	2	1	151	81	1	0	6.7	110.01	3.39	1.74	0.75	1.63	3.14	12.8	2.56	295	162	66.2	25.2	28.7	0.93	44.7	47.2	26.4	19	79.9	32.5	28.5
0	51	1	2	7	2	2	111	79	1	0	13	107.77	6.24	4.81	1.48	3.26	3.05	11.9	2.53	352	173	95.4	31.9	32.2	0.95	60.9	64.7	35.9	30.7	138	35.9	30.6
0	46	1	2	12	2	1	122	83	1	0	6.8	97.74	5.04	1.34	1.09	2.77	2.93	12.4	1.07	318	176	74.1	23.9	21.6	0.9	54.9	58.1	32.3	16	75.7	31	27.9
0	54	1	1	7	2	2	146	90	1	0	7.1	116.66	5.96	6.16	1.25	2.94	2.71	12.3	1.75	345	170	71.4	24.7	22.9	0.86	52	55	29.9	16.4	80	29.7	26.5
0	49	2	1	8	1	1	139	84	1	1	8.8	107.99	5.68	3.58	1.03	3.12	2.95	13.8	2	300.5	173	86	28.7	27.4	0.94	59.1	62.4	35.1	23.6	104.1	34.2	29.9
0	44	2	2	7	2	1	161	97	1	0	9.2	117.05	4.69	3.54	1.02	2.13	2.94	13.1	1.04	265	184	78.3	23.1	20.4	0.89	58.9	62.4	34.4	15.9	79.1	30.8	28.1
0	60	1	1	8	2	2	91	65	1	0	11.9	104.61	4.96	7.53	1.03	1.97	2.8	12.7	2.04	370	174	71.1	23.5	23.9	0.92	51.1	54.1	30.2	17	76.5	31.3	28
0	51	1	1	12	2	1	109	76	1	1	10.9	122.16	4.74	3.29	1.05	2.29	2.65	10.97	1.87	427	170	59.8	20.7	13.5	0.86	49	51.8	29.1	8	32.1	28.4	26
0	60	2	2	14	2	1	100	70	1	1	7.3	99.9	4.57	1.03	1.1	2.31	2.85	14.7	0.74	229	159	69.5	27.5	36.6	0.91	41.7	44.1	23.8	25.4	128.2	31.4	26.5
0	40	1	1	1	2	2	140	100	1	0	7.5	138.44	3.64	1.29	0.77	2.31	3.01	12.6	1.37	301	159	69.5	27.5	36.6	0.91	41.7	44.1	23.8	25.4	128.2	31.4	26.5
0	64	2	2	6	2	1	132	78	1	0	6.3	99.01	3.87	2.36	0.86	1.88	3.26	11.6	4	331	178	87.8	27.7	26.8	0.99	60.6	64.2	35.8	23.6	114.1	33.8	29.6
0	42	1	1	9	1	1	132	96	1	0	6.1	108	4.26	1.07	1.06	2.58	2.93	15.6	2.5	451	170	73.8	25.5	26.5	0.89	51.3	54.2	30	19.6	86.5	31.4	27.8
0	56	2	1	10	2	1	125	78	1	0	7.2	110.74	3.89	0.44	1.5	1.65	2.78	13.8	1.12	360	162	60.1	22.9	21.3	0.88	44.7	47.3	26.1	12.8	59	30.1	27.2
0	71	2	2	22	2	1	105	67	1	1	6.6	94.88	2.82	0.74	1.17	0.97	3.17	11.9	2.75	250	171	82.7	28.3	32.2	0.97	52.8	56	31.1	26.7	124.3	34.1	29.1
0	22	2	2	1	2	1	122	86	1	0	9.8	125.88	3.97	2.75	0.82	2.22	2.62	14.1	1.05	571	173	75	25.1	32.7	0.99	47.6	50.5	27.9	24.5	118.4	33.1	28.7
0	47	2	2	11	2	1	140	96	1	0	5.8	112.35	4.9	2.7	0.96	2.59	2.88	11.5	2.03	417	171	80.2	27.4	29.5	0.92	53.5	56.6	31.2	23.6	104.3	32.5	28.4
0	61	2	2	10	2	2	118	73	1	0	7	110.29	2.92	0.79	1.2	1.06	2.87	11.5	1.32	294	170	75.6	26.2	24.1	0.91	54.2	57.4	31.8	18.2	85.7	32.5	29.1
0	38	2	2	2	2	2	130	90	1	1	10.7	117.33	4.6	1.32	1.06	2.74	2.58	15.3	2.03	360	174	84.7	28	31.9	1.04	54.4	57.6	32.1	27.1	132.4	35.4	30.9
0	33	2	2	9	2	1	115	78	1	0	8.5	136.49	4.68	4.32	1.01	2.21	3.12	13.2	0.76	286	170	94.8	32.8	29.7	0.97	63	66.6	37.8	28.2	121.7	37.2	32.1
0	38	1	1	1	2	1	131	94	1	1	9	108.03	3.79	3.65	0.76	2.21	3.13	13.3	2.98	344	172	68.8	23.3	27.1	0.94	47.4	50.2	27.2	18.6	92.8	30.8	27.6
0	45	2	2	9	2	1	134	89	1	1	11.4	111.7	4.79	2.13	1.15	2.73	2.52	12.3	1.28	304	171	63.3	21.6	24.5	0.89	45.1	47.8	26.3	15.5	67.9	29.1	25.7
0	62	2	2	15	1	2	145	100	1	0	8.6	97.9	2.76	0.59	0.75	1.32	2.82	10	4.38	317	171	66.6	22.8	23.7	0.92	47.9	50.8	27.8	15.8	78.2	29.6	26.3
0	53	1	2	6	1	2	133	100	1	0	8.1	106.27	4.38	2.42	1.03	2.62	3.34	12.1	2.99	432	168	74	26.2	28	0.98	50.4	53.3	29.7	20.7	95.4	33.7	29.8
0	50	1	2	5	2	2	113	88	1	0	8.7	107.84	6.98	2.24	0.97	4.93	2.9	13.6	3.83	247	172	72.2	24.4	30.8	0.99	47.2	50	27.2	22.2	109.9	31.9	27.9
0	63	1	2	10	1	1	112	74	1	0	7.2	90.85	3.75	1.79	0.68	2.3	2.91	11.9	1.55	284	169	80.9	28.3	31.3	0.92	52.5	55.6	30.9	25.3	109.9	33.9	29.5
0	61	1	2	25	1	2	115	69	1	1	6.2	108.56	3.92	0.8	1.36	1.7	2.97	13.7	1.95	270	169	86.6	30.3	30.5	0.92	56.9	60.2	33.7	26.4	110.6	35.1	30.4
0	52	1	2	6	1	2	140	90	1	0	7.7	110.66	4.2	3.76	0.87	2.29	3.07	16.3	0.932	380	178	90.7	28.6	27.3	0.97	62.3	66	37.2	24.7	110.8	35.2	30.7
0	73	2	2	31	1	2	162	80	1	1	7.2	22.33	4.43	1.22	0.95	2.75	3.67	15.3	1.11	400	172	112.6	38.1	38.5	1.06	65.2	69.2	39.2	43.4	203.7	41.6	34
0	69	1	2	21	1	2	115	64	1	1	8.3	96.87	3.66	1.22	0.71	2.21	2.76	11.3	4.07	263	179	76.6	23.9	20.7	0.91	57.3	60.7	33.5	15.9	80	31.7	29.1
0	59	1	2	14	1	1	100	65	1	1	6.8	113.7	1.33	0.74	0.68	0.19	3.12	13	3.73	186	174	83.2	27.5	27.9	1	56.6	60	33.6	23.2	109.1	34.6	30.2
0	73	2	2	20	1	1	152	71	1	1	10.7	103.93	2.69	0.38	1.26	0.86	2.17	10.2	0.876	205	173	85.1	28.4	33.7	1.1	53.3	56.4	31.8	28.7	145.2	36.4	31.2
0	76	2	2	10	2	2	138	80	1	1	9.2	96.9	3.06	1	0.87	1.62	2.23	11.6	1.83	176	168	81.3	28.8	27.7	0.92	55.5	58.8	33.3	22.5	93.3	34.8	30.3
0	71	2	2	19	2	2	141	77	1	1	7	95.49	2.51	1.01	0.76	1	2.61	9.67	4.76	257	169	63.1	22.1	19	0.87	48.4	51.1	28.5	12	53	29.7	27.3
0	59	2	1	22	1	1	166	82	0	1	5.7	93.21	5.28	0.78	1.55	2.49	3.26	12.9	2.39	346	165	75.4	27.7	34.2	0.99	46.9	49.6	27.5	25.8	126	34	29.2
0	62	1	1	25	1	1	170	110	1	1	9.4	70.05	4.61	2.37	1.09	2.69	3.23	14.4	3.11	187	180	83.5	25.8	21.6	0.96	62.1	65.4	36.8	18.1	88.4	34.1	31.6
0	59	1	2	10	2	1	110	69	1	0	5.3	127.12	3.04	0.88	1.2	1.17	2.73	11.09	2.76	161	165	70.4	25.9	31.6	0.98	45.3	48.1	26.7	22.3	104.5	33.7	29.2
0	69	2	2	6	2	2	162	82	1	1	10.4	89.47	4.36	2.33	0.9	2.43	3.23	12	2.19	278	171	59.4	20.3	22.6	0.92	43.4	46	25.1	13.4	65.3	27.7	24.7
0	51	2	2	10	1	1	120	87	0	1	9.6	105.76	3.15	1.33	0.9	1.09	3.26	12	1.79	221	159	64.6	25.6	34.1	0.92	40.3	42.6	22.7	22	114.1	31	26.7
0	68	1	2	17	1	1	160	87	0	1	10.6	46.416	6.85	2.45	1.2	4.62	2.66	11.5	1.3	390	180	107.3	33.1	37.9	0.99	62.5	66.6	36.2	40.7	192.3	34.2	27.8
0	73	2	2	16	2	2	138	78	0	1	9.1	39.62	5.95	1.86	1	3.5	2.5	13.2	5.3	334.3	170	72.9	25.2	26.7	0.93	50.6	53.5	29.7	19.4	88.1	32.3	28.8
0	79	2	2	20	2	2	109	76	1	1	8	85.33	4.88	1.01	1.19	2.87	2.74	13.5	3.43	260	168	72.6	25.7	25.8	0.89	50.9	53.9	30.1	18.7	79	32.4	28.6
0	57	1	2	18	1	2	142	85	1	0	7.1	16.99	5.17	2.18	0.99	2.79	2.55	10.9	2.82	368	178	84.1	26.5	20.6	0.9	62.9	66.8	37.6	17.3	81.5	33.5	30
0	72	2	2	19	1	1	134	75	1	1	7.1	88.6	5.24	1.96	1.18	3.22	3.43	11.4	1.84	381	175	70.1	22.9	24.1	0.93	50.2	53.2	29.1	16.9	84.9	31.2	28.3
0	55	1	1	11	1	1	157	99	1	1	7.2	57.9	2.77	1.09	0.76	1.27	2.68	13.9	4.3	308.3	170	67.9	23.5	24.9	0.93	48.1	51	28	16.9	81.6	30.7	27.3
0	35	1	1	4	2	1	140	90	0	1	9.8	168.2	4.05	0.88	1.06	2.27	2.81	15.7	1.01	223	172	73.8	24.9	26.2	0.92	51.5	54.5	30.3	19.3	86.1	32.5	29
0	43	1	1	8	1	2	126	72	1	0	6.4	134.6	2.47	3.11	0.83	0.9	2.34	12.8	4.09	284	170	67.7	23.4	29	1.03	45.5	48.1	26.8	19.6	91.3	32	28.1
0	54	1	1	15	1	1	123	78	1	1	6.4	115.85	3.69	1.45	0.9	2.07	3	13.1	2.4	217	169	73.2	25.6	30.1	0.92	48.2	51.1	28.3	22.1	95.3	31.3	26.8
0	36	2	2	3	2	1	116	80	0	1	9.7	135	4.64	4.16	1.2	1.89	2.35	11.1	1	268	173	68.4	22.9	23	0.87	49.6	52.7	28.6	15.7	76.9	29.3	26.3
0	68	2	2	22	1	2	103	67	1	1	7.1	97.55	3.07	1.59	0.83	1.5	2.79	12.4	4.16	273	167	69.8	25	26.8	0.92	48.4	51.1	28.4	18.7	82.7	32.1	28.6
0	44	2	1	8	2	1	132	94	0	0	8.2	105.49	6.66	3.08	1.36	4.02	2.94	12.1	7.44	325	168	71.4	25.3	16.5	0.85	56.4	59.6	33.5	11.8	52.8	32.1	29.6
0	72	2	2	1	1	2	175	104	0	0	5.4	90.8	5.21	2.51	0.79	3.62	2.81	12.4	3.8	326	159	57.7	22.8	28	0.9	39.2	41.5	22.4	16.2	74.7	28.8	25.1
0	65	2	1	18	1	1	129	78	0	0	7.9	91.51	1.95	0.92	1.07	0.32	3.11	12.2	0.907	256	175	92	30	21.9	0.91	67.9	71.8	41.3	20.2	88.3	36.8	33.1
0	52	1	1	3	2	1	120	80	1	0	7.3	112.24	4.88	3.81	0.95	3.03	3.55	14	3.73	385	170	65	22.5	24.1	0.89	46.5	49.3	27	15.7	74	29.3	26.1
0	54	1	2	8	2	2	150	94	1	0	9.7	99.41	6.3	3.91	1.32	3.99	3.19	11.9	4.26	300	172	70.6	23.9	24.2	0.9	50.5	53.5	29.7	17.1	76.9	30.8	27.3
0	12	2	2	1	2	2	139	86	0	0	13.1	179.55	2.94	1.03	1.53	1.79	2.89	11.06	3.88	318	175	84.7	27.7	22.3	0.93	62.1	65.8	37.4	18.9	85.6	34.8	31
0	21	1	1	1	2	1	130	78	0	0	13	146.07	4.05	2.3	0.82	1.92	2.57	15.2	0.692	237	165	76.8	28.2	26	0.93	53.9	56.9	31.7	19.9	92	34.3	30.7
0	32	1	2	1	2	2	115	84	0	0	10.8	136.49	4.69	5.69	1.05	1.92	2.94	13.5	1.81	263	170	87.2	30.2	28.7	0.97	58.8	62.2	34.8	25	113.9	36.4	32.2
0	50	2	2	2	2	1	139	81	0	0	8.6	103.88	3.87	1.73	0.95	2.05	2.56	11.9	1.04	336	174	81.5	26.9	25	0.9	57.8	61.1	33.9	20.4	93.9	33	29.5
0	35	2	2	1	2	2	136	98	0	0	11.6	122.18	4.98	2.84	0.91	3.59	2.84	14	1.46	489	165	61.5	22.6	29.2	0.96	41.1	43.6	23.6	17.9	87.1	30.8	27.5
0	37	1	2	1	2	2	124	86	0	0	13.8	118.91	4.1	0.95	1.04	2.49	2.25	13.39	1.16	332	165	86.7	31.8	37.7	1.01	51	54	30	32.7	162.3	37	31.1
0	34	2	2	2	1	2	150	110	0	0	14.6	133.47	4.94	1.28	1.04	3.08	2.97	14.8	1.33	380	172	68.9	23.3	22.3	0.87	50.6	53.6	29.8	15.3	67.7	30.7	27.7
0	53	1	2	1	2	2	113	76	0	0	11.7	116.79	4.86	3.24	0.95	2.76	2.99	12.5	4.1	276	165	63.8	23.4	25.7	0.91	44.8	47.4	26.4	16.4	69.7	30.6	27
0	39	1	2	1	2	2	137	82	0	0	10.3	117.25	3.45	0.92	1	1.76	3.28	12.2	2.78	331	175	92.2	30.1	29.6	1.02	61.3	64.9	36.1	27.3	129.8	35.6	31
0	30	1	1	1	2	1	141	87	0	0	10.9	131.47	4.87	3.07	0.91	3.05	3.06	15.6	2.59	443.6	175	90	29.4	26.8	0.98	62.2	65.9	37.3	24.1	109.8	36.1	31.6
0	28	2	1	1	2	1	132	90	0	0	13.9	125.08	7.26	5.05	1.16	3.48	2.91	12.3	1.73	637.6	170	78.3	27.1	30.9	0.98	51.1	54.1	30.6	24.2	105.8	34.7	30.2
0	61	1	1	1	2	2	148	88	0	0	12.7	121.87	4.23	0.91	1.45	2.02	2.91	14.4	1.39	209	175	72.4	23.6	21.8	0.89	53.4	56.6	31.4	15.8	73.1	30.9	27.8
0	38	1	1	1	2	1	124	81	0	0	9.7	118.79	5.17	0.63	1.29	3.05	2.92	12.9	1.17	277	165	81.5	29.9	25.9	0.93	57.2	60.4	34.7	21.1	86.4	36.4	32
0	33	1	2	2	1	2	104	78	0	0	12	123.46	3.65	1.01	0.93	2.03	3.05	14	1.21	193	170	74.6	25.8	24.6	0.88	53.1	56.3	31.3	18.3	80.2	32.2	28.6
0	37	2	2	4	2	1	130	80	0	0	12.5	128.49	4.42	0.92	1.06	3.02	2.88	12.5	1.26	292	165	67.5	24.8	36.7	1.04	40.4	42.8	22.9	24.7	143.8	31.6	27.2
0	41	2	2	1	2	1	127	84	0	0	12.7	118.72	6.22	3.15	1.19	3.76	3	14.3	2.82	297	181	77.4	23.6	24.8	0.96	55	58.2	32.8	19.2	87.5	32.4	28.9
0	35	2	2	1	2	2	116	78	0	0	10.8	112.98	5.11	1.67	1.24	2.98	2.7	13.9	2.99	369	173	72.3	24.2	24.8	0.92	51.3	54.3	29.8	18	87.8	30.7	27.4
0	46	1	2	1	2	1	114	71	0	0	10.1	116.23	5.3	1.5	0.99	3.35	3.13	11.9	2.29	351	167	70.6	25.3	20.3	0.88	53.1	56.3	32	14.3	58	32.4	28.8
0	39	2	2	1	2	1	138	96	0	0	8.7	122.97	5.12	3.37	0.96	2.86	4.03	15.4	0.827	275	172	63.7	21.5	23.2	0.94	46.2	48.9	27	14.8	70.4	29.5	26.2
0	44	2	2	1	2	1	116	83	0	0	11.8	113.94	5.88	1.46	1.08	4.16	2.9	13.8	4.55	432	176	78.5	25.3	23.4	0.9	56.6	60.2	33.2	18.3	88.6	32.9	29.7
0	36	1	1	1	2	1	130	87	0	0	12.6	136.91	5.71	8	0.97	3.16	3.04	14.9	1.17	249	176	95.7	30.9	30.8	0.92	62.4	66.2	38	29.5	116	36.4	30.8
0	35	1	1	1	2	2	139	86	0	0	12.1	133.47	3.65	1.07	0.71	2.36	2.49	14	1.17	362	169	82.1	28.7	32.2	0.94	52.6	55.7	31	26.4	118.3	34	29.2
0	33	2	2	1	2	1	158	108	0	0	10.3	117.88	4.5	2.47	0.92	2.38	3.33	11.3	3.3	368	171	61.1	20.9	19.4	0.87	46.4	49.2	26.9	11.9	58.3	28.8	26.5
0	20	1	2	1	2	1	150	90	0	0	9.9	136.66	6.97	9.06	1.05	3.67	2.82	13.4	3.88	495	160	65.5	25.6	31.3	0.91	42.5	45	24.9	20.5	88.5	31.6	27
0	57	2	2	1	2	1	124	85	0	0	11.9	125.34	2.73	0.54	1.38	0.91	2.95	13.1	1.02	192	170	76.9	26.6	30.4	0.9	50.5	53.5	29.5	23.4	100	31.8	27.5
0	30	2	2	1	2	2	116	89	0	0	13.8	132	5.16	1.26	1.13	3.28	3.05	12.8	2.36	260	169	60.3	21.1	9.1	0.73	51.7	54.8	30.3	5.5	22.6	27.8	26.6
0	50	2	2	1	2	1	126	82	0	0	12.8	116.38	3.13	0.7	0.85	1.59	2.86	11.3	1.94	219	170	90.9	31.5	38	1.03	53.2	56.3	31.5	34.6	170.7	37.3	31.2
0	63	1	2	6	1	2	120	68	1	0	7.2	91.97	2.75	0.98	0.93	1.27	2.74	13.7	3.45	375	170	63.6	22	23.4	0.93	46	48.7	26.7	14.9	72.4	29.9	26.9
0	65	2	2	20	2	2	120	70	1	1	7.5	99.66	3.48	0.63	1.04	0.99	2.9	16.1	1.87	308	170	75.1	26	25.4	0.86	52.8	56.1	31.3	19	79.1	31.6	27.4
0	65	1	2	30	2	1	116	60	1	1	9.2	92.54	2.49	0.61	1.07	0.89	3.03	13.7	2.41	239	170	69.2	23.9	21.8	0.87	51.1	54.1	29.7	15.1	73.3	31	28.2
0	68	2	2	22	1	2	163	86	1	0	9.5	75.36	3.11	2.84	0.8	1.36	2.64	11.2	2.76	413	170	81.4	28.2	26.3	0.94	56.8	60	33.9	21.4	93.4	34.4	30.2
0	35	2	2	1	2	1	113	72	0	0	11.9	137.87	4.74	5.9	1.04	2.53	2.84	15.5	0.82	241	176	80.6	26	23.9	0.94	57.9	61.3	34.5	19.3	88.4	33.5	29.8
0	59	2	2	20	1	1	118	78	0	1	7.8	91.18	3.83	1.42	1.09	1.88	3.02	12.8	0.945	335	170	68.3	23.6	23.6	0.93	49.3	52.2	28.7	16.1	78.7	31.1	27.9
0	36	1	2	2	2	2	122	84	1	1	12.8	131.03	5.17	1.44	0.95	3.32	2.67	11.8	2.2	393.2	169	83.5	29.2	29.3	0.95	55.7	59.1	32.6	24.4	113.3	35.3	31
0	46	2	2	5	2	1	140	90	0	1	8.1	111.7	5.86	2.33	1.23	3.28	2.43	9.35	3.16	349	168	68.6	24.3	19.9	0.84	51.9	55	30.7	13.6	58.1	31.3	28.5
0	51	2	2	16	1	1	133	85	1	1	5.3	68.82	4.3	1.72	0.99	2.44	3.25	14.4	2.52	449	183	88.3	26.4	24.9	0.94	62.7	66.3	37.2	22	101.6	34	30.6
0	43	2	2	10	2	2	140	90	0	1	10.8	116.25	4.73	2.86	1.02	2.77	3.11	12.6	1.7	372	178	92.5	29.2	29.2	0.81	61.8	65.5	35	27	113.1	30.2	26.6
0	66	1	2	11	2	2	119	80	0	1	8.1	77.46	4.95	2.88	0.88	2.52	3.09	12.4	1.83	195	165	71.4	26.2	23.5	0.88	51.6	54.6	30.4	16.8	74.1	32.4	28.8
0	40	2	2	12	2	1	130	92	1	1	12	119.56	3.76	1.85	0.88	1.83	3.6	12.4	1.16	234	165	74.5	27.4	30.1	0.92	49.2	52.1	28.7	22.4	98.9	33.4	29.4
0	59	1	2	17	2	2	136	79	1	1	11	97.63	6.11	2.55	1.11	4.07	3.14	14.5	0.933	432	170	61.7	21.3	15.9	0.8	49.1	51.9	28.4	9.8	47.7	28.2	26.4
0	59	1	1	14	1	1	108	69	0	1	6.5	94.43	2.71	1.32	1.38	0.56	2.87	12.2	4.83	320.3	168	58.7	20.8	30.3	0.89	38.6	40.9	21.5	17.8	90.2	28	25
0	68	1	2	17	1	2	140	80	1	1	8.1	93.95	1.89	0.53	1.16	0.26	2.61	15.4	1.17	296	169	60.9	21.3	15.5	0.86	48.6	51.4	28.8	9.5	39.1	29.3	27.1
0	51	1	1	19	1	1	122	85	1	1	6.6	107.77	3.48	1.62	1.35	1.2	2.65	14.7	1.58	413	167	69.7	25	25.9	0.88	48.8	51.7	28.1	18	86.2	30.2	26.7
0	37	2	2	1	2	1	114	70	0	1	13.7	123.82	5.01	1.67	1.13	2.84	2.73	13.7	1.31	337	163	73	27.5	34.4	0.96	45.1	47.9	25.6	25.1	132.8	31.9	27.2
0	33	1	1	3	2	2	140	78	0	1	11.1	60.1	4.8	1.92	0.8	2.41	3.23	11.9	0.924	383	165	82	30.1	34.9	1.04	50.6	53.4	29.8	28.6	144.6	37	32.1
0	40	1	2	11	2	2	130	88	0	1	8.8	116.37	4.43	8	0.89	1.53	3.05	14.8	0.9	190	175	66.7	21.8	16.4	0.88	52.8	55.8	31.2	10.9	50.8	29.9	27.5
0	61	1	2	1	1	2	142	90	0	1	9.1	109.32	3.55	1.56	0.87	1.74	2.38	10.9	4.04	220	167	71.4	25.6	24.7	0.9	50.9	53.8	29.4	17.6	86.3	32	28.8
0	52	1	2	10	2	1	148	91	1	1	11.7	106.96	6.01	1.53	1.08	4.26	3.14	14.4	0.93	229	160	59.4	23.2	28	0.88	40.5	42.8	23.4	16.6	70.2	29.6	25.8
0	63	1	1	1	1	1	135	73	0	0	13.2	100.36	3.64	0.84	0.97	1.83	3.35	11.6	1.66	344	160	73.7	28.8	35.8	0.96	44.7	47.3	25.9	26.4	132.1	34.4	29.4
0	63	2	2	25	1	1	122	74	0	1	8.5	99.06	3.23	1.02	0.9	1.47	3.15	11.4	0.88	334	169	64.8	22.7	19.9	0.83	48.9	51.9	28	12.9	66.9	29.1	26.7
0	60	2	1	16	1	2	150	100	1	1	6.3	99.38	4.01	1.07	0.96	2.12	2.91	13	3.58	254	170	71.4	24.7	24.6	0.92	50.8	53.8	29.5	17.6	86.3	32.1	29
0	47	1	2	4	2	1	123	83	1	1	11.4	125.64	4.52	1.78	0.84	2.88	2.61	12	0.7	299	170	76.8	26.6	25	0.9	54.6	57.6	32.5	19.2	80	33	29.3
0	29	2	2	6	2	2	143	86	1	1	9.1	138.9	5.62	1.25	1.14	3.55	3.33	13.1	1.46	386	170	61	21.1	22.7	0.92	44.7	47.2	25.5	13.8	72.3	29.2	26.7
0	45	2	2	3	2	2	132	84	0	1	10	119.7	4.95	5.95	1.05	2.26	2.75	13.7	2.81	225	161	57.2	22.1	22.1	0.91	42.1	44.5	24.1	12.7	65.6	29.4	26.7
0	54	1	2	3	2	2	123	82	0	1	8.6	105.53	4.61	2.16	1.37	2.52	2.88	13.1	1.25	276	172	71.5	24.2	30.3	0.94	46.9	49.8	27.3	21.7	99.3	31.2	27.2
0	31	2	2	4	2	1	137	100	1	1	11.2	127.35	8.92	8.3	1.74	3.3	3.29	15.5	1.81	312	172	72.9	24.6	28.8	0.96	49	51.9	28.1	21	104.2	31.1	27.4
0	44	2	2	3	1	2	123	86	0	0	10.5	117.88	3.77	0.8	0.95	2.24	2.67	11.4	1.63	110	180.5	76.8	23.6	26.8	0.98	52.8	56.2	30.9	20.6	101.8	31	27
0	52	1	1	10	1	1	145	98	1	0	7.3	105.22	3.88	2.06	0.92	1.98	3.96	13.8	3.94	316.2	174	76.7	25.3	21.2	0.81	57.4	60.5	32.7	16.2	79.1	30.2	27.9
0	35	1	1	4	2	1	145	94	0	1	8.4	113.61	4.27	2.7	0.92	2	2.81	12.4	4.42	423	170	81.9	28.3	34.5	0.95	50.6	53.6	29.3	28.3	137	32.6	27.8
0	49	2	2	4	1	1	131	83	0	1	7.3	103.54	3.58	4.31	1.08	1.3	3.1	11.4	0.984	413	170	64.7	22.4	15.7	0.67	51.9	54.5	28.7	10.2	53.4	25.5	24.9
0	60	1	2	8	2	2	147	87	1	1	6.2	97.51	4.4	1.87	1.08	2.5	3.11	13.5	1.83	266	165	48.6	17.9	26.1	0.88	33.9	35.9	19.1	12.7	58.7	25.5	22.6
0	51	1	2	7	1	2	142	94	1	1	6.2	114.7	2.28	0.99	0.79	0.87	3.42	12.3	1.06	348	171	76	26	24.8	0.91	53.9	57.2	31.7	18.8	87.4	32.8	29
0	40	1	2	5	2	1	109	71	0	1	7.7	123.91	3.66	0.57	1.3	1.63	2.53	14.8	1.09	181	183	96.2	28.7	33.9	1	59.6	63.6	34.8	32.6	158.6	33.2	27.7
0	33	1	2	5	2	1	121	77	0	1	7.4	128.26	3.72	1.04	0.97	2.22	3.32	12.1	1.08	236	160	72.5	28.3	29.3	0.96	48.5	51.3	28.6	21.2	94.8	34.4	30
0	69	2	2	15	2	2	129	80	1	1	5.6	96.94	5.44	1.44	0.97	3.45	2.59	11.2	4.36	312	172	65.1	22	23.2	0.94	47.3	50	27.7	15.1	71.6	30.1	26.9
0	56	1	1	8	2	1	114	81	1	1	17.3	108.35	5.75	1.83	1.52	3.16	2.67	15.6	1.02	219	178	72.8	23	23.7	0.9	52.5	55.6	30.8	17.2	78.2	30.4	27.2
0	61	1	1	6	2	1	144	95	1	1	6.7	79.16	3.83	1.99	1.06	1.86	3.4	13.1	3.84	265	171	73.5	25.1	31	0.92	47.9	50.7	27.7	22.8	104.5	31.5	27.5
0	65	2	2	20	1	1	116	64	0	1	8.8	94.71	3.99	1.75	0.89	2.27	2.6	11.6	2.63	244	170	72.9	25.2	29.5	0.92	48.4	51.4	29	21.5	84.8	32.2	27.5
0	52	2	2	15	2	2	131	90	0	1	7.9	100.27	4.44	1.24	0.9	2.79	4.05	16.2	1.19	336	177	81.1	25.9	32	0.99	51.9	55.2	30	25.9	129.3	31.3	26.6
0	65	2	2	20	1	1	137	93	0	1	7.4	98.96	3.57	2.18	0.85	1.69	3.15	13.4	3.96	236	168	69.7	24.7	28.7	0.9	46.9	49.7	27.4	20	87	30.8	26.8
0	49	1	1	10	1	1	108	77	0	1	9.5	114.63	5.46	1.67	1.42	3.14	2.96	13.6	3.33	535	175	71.7	23.4	20.9	0.89	53.5	56.7	31.5	15	70.4	31.4	28.6
0	49	1	1	9	1	1	133	95	1	1	12.2	119.04	5.92	6.53	1.25	3.69	2.55	12.9	0.839	452	170	85	29.4	31.9	0.92	54.7	57.9	31.9	27.1	122	34	29.4
0	67	2	2	8	1	2	143	76	0	1	6.8	98.24	3.13	0.77	1.19	1.16	2.85	11.2	2.4	335	170	82	28.4	28.9	0.98	55.2	58.3	32.6	23.7	108.2	34.6	30.4
0	58	2	2	10	1	2	155	86	1	1	9	104.65	3.91	2.72	1.03	1.82	2.95	12.16	1.73	298	177	71.7	22.9	24	0.89	51.3	54.5	29.6	17.2	85	29.7	26.6
0	58	1	2	12	1	1	133	89	1	1	7.4	116.48	2.96	1.55	0.92	1.35	2.9	11.8	0.916	234	172	67.9	23	23.6	0.89	48.9	51.8	28.3	16.1	77.8	30.1	27.3
0	73	2	1	10	2	1	157	90	1	1	8.7	84.53	3.61	1.03	1.12	1.78	2.76	11.6	3.31	235	168	82.8	29.3	31.4	0.97	53.7	56.8	31.6	26	119.8	35.2	30.5
0	40	1	1	5	2	1	114	83	0	1	9.8	117.19	2.61	1.54	0.85	1.08	2.62	12.3	0.795	316	174	104.7	34.6	40.2	0.97	58.8	62.6	34.2	42.1	195.1	35.9	28.9
0	42	2	2	16	2	1	139	108	1	1	12.7	123.77	8.58	2.79	1.29	5.84	2.91	12.3	2.63	299.8	171	69.2	23.7	20.3	0.94	52.2	55.2	31.1	14	63.4	31.2	27.7
0	51	1	1	6	2	2	152	94	1	0	6.6	110.66	4.69	2.05	0.91	2.24	2.93	12.1	3.06	308	171	77.6	26.5	23.9	0.9	55.8	59	32.8	18.6	85.7	32.5	29.1
0	42	2	2	5	2	1	120	70	1	1	6.7	118.71	5.89	0.97	1.62	3.16	3.36	11.27	5.06	333	166	84.3	30.6	26.7	0.93	58.5	61.8	34.9	22.5	97.6	36.3	32.1
0	45	2	2	11	2	1	125	81	1	1	7.8	111.09	3.6	2.09	1.04	1.64	2.9	13.6	1.28	396	173	99.9	33.4	38.6	1.02	57.9	61.3	34	38.6	186.7	38.4	32.5
0	56	1	2	6	1	2	150	98	0	1	7.6	116.31	5.37	4.83	0.95	2.97	2.83	13.5	0.73	310	168	53.2	18.8	16.9	0.82	41.8	44.2	24.2	9	38.8	26.4	24.2
0	54	1	2	1	2	1	137	96	0	1	6.3	96.96	3.9	0.87	0.83	2.68	2.7	15.6	0.586	29.8	181	76.3	23.3	14.9	0.86	61.4	64.9	36.7	11.4	50.4	32.1	30.1
0	45	1	1	5	2	2	130	93	0	0	11	111	4.87	0.91	1.26	3.02	2.76	11.9	2.07	374	170	66	22.8	19.5	0.87	50.1	53.1	29.7	12.9	56.3	30	27
0	33	1	2	4	2	2	120	96	0	1	9	148.36	4.35	3.69	0.75	2.64	2.93	12.57	0.756	342	168	56.6	20.1	19.1	0.89	43.3	45.8	25	10.8	52.8	27.7	25.2
0	59	2	2	15	1	1	133	74	1	1	6.4	110.87	3.36	0.82	1.31	1.42	2.78	13.3	2.46	293	167	90	32.3	33.7	0.99	56.5	59.7	33.7	30.3	138.5	38	32.6
0	63	1	2	6	1	2	132	89	1	0	9.1	105.43	4.83	0.27	1.05	2.97	3.27	12.5	4.17	299	178	101.3	32	35	1.09	62.1	65.9	37.2	35.4	174.9	38	31.7
0	40	1	2	3	2	2	134	84	0	0	8.7	116.43	5.43	1.33	0.87	3.93	3.15	11.26	7.42	280	161	61	23.5	22.7	0.86	44.6	47.2	25.5	13.8	68.7	29.4	26.4
0	50	1	1	3	2	2	124	90	0	0	6.7	102.82	4.8	1.66	0.82	3.3	3.45	12.5	0.78	237	179	79.5	24.8	27.4	0.99	54.2	57.7	32.2	21.8	102.7	32.2	27.9
0	46	1	1	5	2	1	110	80	1	1	6.26	112.35	2.37	3.82	0.62	0.97	3.18	12.3	1.36	412	174	95.1	31.4	36.1	1.03	57.3	60.7	34.2	34.4	165.3	37.2	31.3
0	44	1	2	1	2	2	114	84	0	0	12.2	122.33	6.09	2.71	1.3	4.1	3.02	12.5	1.46	385	169	69.4	24.3	26.6	0.88	48	50.9	28.4	18.5	75.6	30.9	26.8
0	53	1	2	6	1	2	134	90	1	1	10.8	109.88	5.52	3.81	0.95	3.94	3.15	12.5	1.89	278	169	74.2	26	31.7	1.01	47.9	50.7	27.9	23.5	116.4	33.3	29.2
0	42	1	2	5	1	1	145	90	1	1	7.4	107.8	5.09	3.89	0.97	2.62	3	11.9	1.81	389.6	164	64.9	24.1	24.3	0.87	46.4	49.1	27.5	15.8	63.5	30.6	26.9
0	63	2	1	11	2	2	140	80	0	1	10.8	99.7	4.01	0.94	1.19	2.27	2.78	12.8	2.85	412	165	73.2	26.9	23.4	0.86	53	56.1	31.6	17.1	70.1	33.2	29.4
0	27	1	1	0.02	2	2	142	104	0	0	5.3	122.24	3.19	1.14	0.88	1.51	3.11	14.6	1.62	474	161	68	26.2	28.5	0.96	45.9	48.6	27.5	19.4	80.1	33.9	29.4
0	28	1	2	1	2	1	106	69	0	0	11.2	146.73	4.09	2.83	0.77	2.57	3.21	13.2	1.9	330	178	90.1	28.4	26.3	0.96	62.6	66.4	38	23.7	102.8	35.3	30.1
0	27	1	2	1	2	2	130	80	0	0	13.9	144.82	12.76	5.66	1.46	3.62	2.34	11.1	2.85	606	164	64	23.8	27	0.9	44.1	46.7	26	17.3	70.5	30.9	26.8
0	49	1	2	20	2	2	150	82	0	1	6.5	27.41	5.62	1.67	1.38	2.91	2.34	11.1	4.86	366	167	68.8	24.7	26.2	0.87	47.7	50.8	27.6	18	83.6	30.2	26.4
0	26	2	2	8	1	1	139	93	1	0	11.1	144.59	6.37	1.79	1.02	4.74	3.09	14.9	1.1	393	165	77.7	28.5	33.5	0.88	48.7	51.7	28.8	26	110.8	32.9	27.5
0	42	1	2	3	2	2	104	80	1	1	10.5	123.98	4.04	0.61	1.02	2.47	3.32	13.1	2.29	266	180	114.8	35.4	40.1	1.11	64.6	68.8	38.8	46	221.7	40.9	33.1
0	55	2	2	11	2	1	118	70	0	1	6.7	111.52	4.45	1.26	0.94	2.8	3.25	12	1.88	344	175	70.8	23.1	29.6	0.87	47	49.8	27.2	21	88.7	30.2	26.7
0	50	1	1	10	2	1	102	74	0	1	5.9	114.66	5.47	3.47	1.1	3	3.1	12.9	0.77	256	172	71.1	24	22.8	0.92	51.9	54.9	30.8	16.2	71.9	31.6	28.2
0	55	2	2	2	2	1	120	96	0	0	11	108.35	4.29	1.4	0.87	3.13	2.5	12.8	1.51	226	170	62.7	21.7	30.2	0.97	41.3	43.8	23.8	18.9	89.7	28.9	24.9
0	29	1	2	0.08	2	1	142	106	0	0	12.3	130.06	4.94	9.23	1.06	2.51	3.33	13.7	2.51	480	174	68.7	22.7	10.2	0.82	58.4	61.7	34.8	7	29.7	31	29.8
0	70	2	2	16	1	1	111	67	1	1	6	107.07	5.05	0.74	1.77	2.53	3.13	12.5	3.27	295	174	87.2	28.8	27.1	0.96	60	63.6	35.6	23.6	108.3	35.2	30.9
0	68	1	1	20	2	1	143	71	0	1	7.5	91.55	6.23	2.19	1.2	3.68	2.33	13.2	2.96	284	164	71.1	26.4	20.9	0.84	53.2	56.2	31.6	14.9	61.8	32.6	29.5
0	32	2	2	1	2	2	136	85	0	0	9	136.31	3.87	1.3	0.87	2.52	3.69	14.8	1.42	376	172	67.7	22.9	16.9	0.88	53.2	56.3	30.8	11.4	62.4	30.8	29
0	38	1	1	1	2	2	131	87	0	0	8.9	140.4	5.91	6.03	1.1	3.3	3.11	12.7	0.54	440	159	77.7	30.7	31.1	0.92	50.7	53.5	30.1	24.2	100.9	36	31.2
0	58	2	2	10	2	1	115	75	0	0	11.5	101.88	3.99	0.79	1.19	2.03	2.59	13.3	1.41	201	170	75.7	26.2	23.8	0.95	54.6	57.7	32.8	18	79.3	34.1	30.4
0	77	2	2	10	2	1	144	86	1	0	9.3	108.91	4.17	6.68	1.3	2.35	2.69	11.9	5.18	249	182	84.5	25.5	28.5	0.94	56.9	60.4	33.7	24.1	105.6	32.4	28
0	37	1	1	1	2	2	129	82	0	0	11.9	116.2	3.41	2.86	0.62	1.87	2.74	13.5	4.79	437.3	164	71.5	26.6	25.2	0.88	50.6	53.5	29.3	18	84.8	32.3	28.9
0	55	1	1	9	2	1	120	75	1	1	6.8	99.84	4.13	4.31	0.83	2.05	2.92	10.6	1.03	380	174	76.7	25.3	30.8	0.98	50.1	53.1	29.2	23.6	111.7	32.4	28.2
0	38	2	2	6	2	1	139	97	1	1	13.8	116.59	7.64	1.89	1.71	5.08	2.88	14.8	0.894	491	169	58.5	20.5	9.9	0.83	49.8	52.7	29.1	5.8	28.6	28.2	26.7
0	56	2	1	25	2	2	140	90	1	0	9.9	97.47	4.45	1.48	0.99	2.98	2.7	13.5	2.72	318	174	94.9	31.3	32.4	0.96	60.6	64.1	36.5	30.8	131.4	36.2	30.6
0	31	1	1	1	2	2	112	65	0	1	12.3	125.78	3.03	1.03	0.81	1.67	2.81	11.8	1.89	333	176	76.4	24.7	23.4	0.93	55.2	58.5	33.1	17.9	78.9	31.9	28
0	31	1	2	1	2	2	127	96	0	0	7.9	124.03	3.75	1.47	0.8	2.12	3.12	13.2	1.37	428	170	62.3	21.6	11.5	0.75	52.1	55.2	30.9	7.1	25.2	27.9	25.8
0	55	2	2	12	2	2	144	89	1	1	12.9	116.94	5.22	1.66	1.1	3.26	3.06	14.8	1.84	253	175	74	24.2	19.5	0.91	56.3	59.6	33	14.4	72.5	32.2	29.8
0	73	2	2	12	2	2	143	87	1	1	7.5	94.18	2.22	1.24	0.65	1.02	3.39	12.2	3.08	309	173	77	25.7	31.7	0.94	49.6	52.6	29	24.4	111.8	31.5	26.9
0	51	1	2	12	1	1	139	88	0	0	8.5	120.28	4.14	2.48	0.8	2.56	2.63	12.7	3.1	357	170	71.9	24.9	28.6	1	48.6	51.3	28.7	20.6	94.7	33	29.1
0	66	2	2	3	1	1	142	90	1	0	7.3	81.89	3.74	1.43	1.23	2.19	3.2	10.7	0.86	200	170	73.7	25.5	27.6	0.9	50.3	53.3	29.8	20.4	84.8	32.4	28.2
0	80	1	2	17	2	2	140	90	1	1	9.1	84.24	2.6	2.67	0.67	1.14	2.81	13	1.21	263	172	68.9	23.3	18.7	0.84	52.9	56	30.5	12.9	66.3	29.8	27.6
0	33	2	2	1	2	1	134	87	1	0	6.1	119.18	5.88	3.22	1.13	3.9	3.16	13.3	1.39	280	170	68.7	23.8	22.9	0.88	50	52.9	29	15.8	75.3	29.4	26.2
0	69	2	2	3	2	2	142	75	1	0	12.1	75.26	4.42	1.47	1.1	2.5	2.92	12.2	2.62	317.7	168	52.6	18.6	10.8	0.77	44.4	46.9	25.5	5.7	26.7	25.7	24.3
0	47	1	1	1	2	1	138	87	0	0	6.3	103.85	3.8	1.37	1.17	1.96	2.87	12.6	3.85	338	170	66.5	23	24.4	0.86	47.4	50.3	27.3	16.2	77	29.8	26.8
0	63	2	2	17	2	2	144	87	1	1	14.3	29.19	9.84	3.81	1.57	6.7	2.64	11.23	1.89	502	157	63.4	25.7	29.7	0.91	42.2	44.5	24.1	18.9	87.1	31.3	27.2
0	53	2	2	11	2	1	120	76	1	1	8	112.27	3.47	0.86	1.31	1.37	2.87	13	0.75	271	172	70.8	23.9	26.2	0.97	49.2	52.2	28.3	18.6	96.4	31.1	27.7
0	50	1	1	1	2	1	119	90	0	0	5.6	110.7	4.58	0.62	11.31	2.58	3.1	10.9	1.79	287	161	70.2	27.1	30.7	0.9	46.1	48.7	26.8	21.5	93.9	33.2	29.2
0	33	2	2	3	2	1	154	99	1	1	6.5	126.46	5.38	1.06	1.25	3.6	3.95	15.3	0.86	536	170	79.4	27.5	29.7	0.93	52.7	55.8	31.3	23.6	98.5	34.6	30.2
0	58	1	1	10	2	1	122	84	1	0	5.7	108.39	3.93	0.74	1.53	1.74	3.19	12.39	1.44	242	175	80.1	26.2	22.1	0.89	58.8	62.4	35.2	17.7	77.5	32.9	29.1
0	53	1	2	5	2	1	151	116	0	1	12.7	111.44	6.97	2.5	1.24	4.99	2.88	13.3	1.63	456	175	70	22.9	23.4	0.87	50.5	53.6	29.4	16.4	76.8	29.5	26.3
0	60	2	2	9	2	2	140	100	1	1	6.8	83.05	4.18	8.1	0.82	1.78	3.18	14.3	0.92	463	177	86.7	27.7	29	0.98	58	61.6	33.5	25.1	125.4	33.8	29.9
0	44	1	2	6	2	2	108	70	1	0	5.8	115.5	4.95	1.81	0.85	3.47	3.29	14.9	0.93	538	165	82.8	30.4	39.3	0.99	47.3	50.2	27.3	32.6	168	34.1	28.2
0	51	1	2	1	2	2	130	94	0	0	10.3	110.9	4.91	1.32	0.93	3.31	3.36	12.9	1.61	252.2	168	75.2	26.6	29.3	0.94	50.2	53.2	29.7	22	95.4	33.3	28.8
0	46	2	2	3	2	2	130	90	1	0	7.6	108.23	0.02	7.03	1.25	4.57	3.34	12.1	2.38	415	170	80.9	28	31	0.98	52.7	55.9	31.3	25	113.9	35.6	31.2
0	51	1	2	15	2	1	100	70	0	1	7.4	102.1	4.99	3.14	0.84	3.28	2.93	12.5	1.14	509	165	66.8	24.5	30	0.94	44.1	46.7	25.4	20.1	93.4	31.1	27.2
0	39	1	1	8	2	1	150	100	0	1	6.6	126.62	2.73	2.08	0.68	1.34	3.32	11.3	4.02	451	169	67.2	23.5	17.8	0.85	52.1	55.2	30.6	12	56.5	31.1	28.5
0	62	2	2	18	1	1	160	85	0	1	7.2	106.97	4.22	1.33	1.04	2.48	3.59	13.6	0.59	276	172	79.3	26.8	25.9	0.95	55.4	58.8	32.7	20.5	96.6	33.2	29.3
0	48	2	2	10	2	2	154	92	0	0	6.2	129.3	5.09	0.95	1.11	3.37	3.1	11.7	3.55	298	175	80.1	26.2	30.4	0.99	52.7	55.8	31.1	24.3	112.3	33.8	29.5
0	61	1	2	12	2	1	121	80	1	1	8.4	102.46	4.24	0.52	1.14	2.59	3.59	12.12	2.4	280	178	74	23.4	20.1	0.87	55.8	59.1	32.9	14.9	68.1	30.9	27.9
0	63	2	2	7	2	1	135	80	1	0	8.5	82.46	5.75	0.51	1.74	3.33	2.33	11.1	6.741	319	171	69.1	23.6	23.7	0.89	49.8	52.7	28.7	16.4	78.4	31.3	28.3
0	64	2	1	31	2	1	147	78	0	1	8.5	71.29	7.28	1.76	1.3	4.73	2.7	11.5	5.9	352	167	70.6	25.3	24.5	0.94	50.4	53.3	29.6	17.3	81.4	32.2	28.7
0	47	2	1	9	1	2	153	99	1	0	8.1	110.14	4.67	1.69	0.99	2.59	3.16	10.7	3.34	357	176	93.7	30.2	26.9	0.98	64.7	68.5	38.9	25.2	114.9	36.7	32.2
0	43	1	2	12	1	2	107	69	1	0	5.8	109.88	4.93	2.01	1.04	3.16	2.52	13.8	2.52	326	170	67.5	23.4	25.5	0.9	47.6	50.3	27.5	17.2	80	30.5	27.4
0	33	1	2	1	2	2	114	74	0	0	12.8	124.74	5.19	2.33	1.02	3.17	2.34	14.1	1.47	283	176	90	29.1	33.8	1.05	55.9	59.6	32.7	30.4	157.6	34.5	29.2
0	38	1	1	1	2	1	147	101	1	0	7.7	139.05	4.49	10.38	0.91	1.72	2.97	13.9	1.08	454	172	71.1	24	23	0.89	51.4	54.7	29.6	16.4	84.1	29.9	27
0	59	1	2	3	2	1	153	90	1	0	6.2	104.65	4.83	1.13	1.68	2.77	3.5	12.6	3.76	254	160	41.7	16.3	20.9	0.78	31.2	33	17	8.7	47.7	22.2	20.1
0	46	2	2	16	2	1	143	84	1	0	7	104.01	7.5	2.91	1.75	4.24	2.61	12.7	2.18	349	170	74.3	25.7	24.4	0.94	53.1	56.2	31.4	18.1	84.2	32.7	29
0	40	1	2	10	2	1	118	75	1	0	6.1	107.34	5.74	2.38	1.09	3.19	3.36	13.6	3.38	297	169	78.7	27.6	31.1	0.98	51.8	54.2	31.2	24.5	102.5	42.1	40.1
0	69	1	1	16	1	1	156	76	1	1	9.3	66.69	6.8	1.67	1.12	5.16	2.66	12.5	3.84	392	165	79.2	29.1	27	0.79	54.6	57.8	30.7	21.4	94.4	32	29.1
0	57	1	2	14	2	2	134	79	1	0	8.4	125.34	6.39	11.24	6.4	2.31	2.86	10.86	2.18	377	170	77.3	26.7	29.7	0.91	51.3	54.4	29.8	22.9	102.6	33.3	29.4
0	48	1	1	4	2	2	136	90	1	0	6.5	115.46	5.05	0.82	2.18	2.41	3.37	13.3	1.16	383	162	57.5	21.9	28.2	0.89	38.9	41.3	22.1	16.2	77	27.7	24
0	38	2	2	9	2	1	100	68	1	1	5.3	115.88	4.31	1.11	1.07	2.74	2.89	12.86	3.44	436	175	74.7	24.4	28.3	0.93	50.6	53.6	28.8	21.1	104.6	31	27.8
0	49	2	2	12	2	1	140	80	1	1	7.9	97.82	2.51	2.47	0.67	1.17	2.81	13.2	1.22	371	165	75	27.5	26.7	0.89	51.8	54.9	30.6	20.1	86.2	33.3	29.2
0	58	1	2	17	1	2	117	77	1	1	6.9	101.95	3.58	2.3	0.89	2	3.5	14.8	1.34	312	168	80.5	28.5	33.3	1	50.7	53.7	29.9	26.8	130.5	34.8	29.7
0	31	2	2	1	2	2	132	95	0	0	9.9	130.08	4.52	1.96	0.93	3.12	3.84	12.63	2.75	320	179	85.6	26.7	30.6	0.93	55.8	59.4	33.2	26.2	111.3	32.2	27.2
0	48	2	2	11	2	2	129	79	1	0	8.5	118.94	4.74	2.07	0.84	3.15	3.11	10.5	1.19	290	175	75.3	24.6	22.1	0.94	55.5	58.7	32.5	16.6	83.3	32.6	29.8
0	61	1	2	17	2	1	106	78	0	1	10.3	112.12	3.64	1.09	0.88	2.26	2.89	12.9	1.88	192	167	78.6	28.2	28.5	0.9	53	56.2	31	22.4	98.4	33.2	28.9
0	40	1	1	1	2	1	123	83	0	0	8.1	123.73	5.23	1.29	1	3.54	3.51	11.7	1.14	309.4	170	75.4	26.1	21.2	0.88	56.3	59.4	33.3	16	71.9	33.1	30.4
0	39	2	1	8	1	2	112	90	1	0	6.3	127.7	3.8	3.52	0.7	2.47	3.62	11.6	1.65	371	176	76.5	24.7	21.7	0.92	56.7	59.9	33.3	16.6	80.8	32.5	29.8
0	49	1	1	16	2	2	140	100	0	0	7.2	108.56	5.75	3.95	0.93	3.82	2.98	12.2	1.87	412.3	175	81.7	26.7	25.2	0.96	57.6	61.1	34.5	20.6	94.5	34	30
0	43	2	1	1	2	1	109	79	1	0	6.9	123.19	4.1	2.16	0.96	2.5	3.07	12.5	1.92	397	168	80.2	28.4	29.8	0.97	53.2	56.3	31.3	23.9	109.2	34.1	29.6
0	68	2	2	9	2	1	152	90	0	1	6.8	95.64	4.78	1.32	1.88	2	2.9	12.8	2.28	387	178	90.7	28.6	31.1	0.97	59	62.5	34.5	28.2	129.8	33.2	28.5
0	61	2	2	14	2	1	107	72	0	1	8.2	118.3	4.19	0.72	1.05	2.68	2.92	11.7	0.637	107	168	56.1	19.9	12.7	0.85	46.3	49	26.7	7.1	37.5	27.9	26.5
0	37	2	2	15	2	1	165	102	0	0	6.5	29.67	7.23	0.7	2.05	4.22	2.33	9.97	3.64	231	166	60	21.8	19.7	0.86	45.6	48.2	26.8	11.8	49.1	29	26.1
0	40	2	2	8	2	2	114	74	1	0	7	120.39	6.85	6.58	1.69	3.82	2.94	14	0.713	414	170	76.3	26.4	25.3	0.87	53.9	57	31.8	19.3	82.3	32.9	29.6
0	32	1	2	1	2	1	130	96	0	0	9.1	123.91	4.37	2.33	0.79	3	3.47	13.7	1.47	500	176	79.9	25.8	24.8	0.93	56.5	60.1	33.8	19.8	89.2	32.7	28.6
0	34	1	2	5	2	1	101	69	0	0	12.1	161.47	6.46	7.72	1.13	2.96	2.62	11	0.9	196	170	72.4	25.1	24.6	0.93	51.8	54.6	30.7	17.8	78.5	33.1	30
0	55	2	2	3	2	2	163	105	1	0	7.9	99.27	4.87	1.35	1.05	3.2	3.57	12.5	2.01	263	167	76.4	27.4	34.4	0.95	47.3	50.1	27.5	26.3	127.6	32.9	28.1
0	42	1	2	1	2	1	125	90	0	0	10.5	126.04	4.24	3.24	0.88	2.34	3.3	13.06	2.74	339	173	75.8	25.3	25.6	0.93	53.3	56.4	31.6	19.4	86.3	33.3	29.8
0	35	2	2	1	2	1	118	74	0	0	9.9	118.45	4.77	2.27	0.91	3.29	3.33	12.23	1.64	338	180	95.5	29.5	31.6	0.99	61.6	65.4	36.6	30.1	137.7	35.7	30.6
0	35	2	2	1	2	2	116	87	0	0	10	128.34	3.4	4.65	0.69	1.71	2.98	12.7	1.12	401	168	57.3	20.3	23.7	0.87	41.2	43.7	23.9	13.6	60	27.7	24.5
0	71	2	2	25	1	2	150	75	0	1	9.1	90.8	4.84	1	1.48	2.78	2.77	12.5	5.51	341	171	69.3	23.7	21.3	0.88	51.5	54.6	30.2	14.7	69.3	31	28
0	43	1	2	15	2	2	130	80	1	1	9	117.88	6.57	4.03	1.19	3.69	3.17	11.34	1.18	336	170	79.6	27.5	33.9	1.03	49.7	52.6	29.1	27	136.3	34.5	29.7
0	26	1	2	1	2	1	134	87	0	0	7	138.82	4.91	4.2	0.9	3.01	3.32	13.5	3.27	534	176	75.6	24.4	30	0.99	49.7	52.9	28.8	22.7	109.9	31	26.8
0	70	2	1	21	2	2	154	79	1	1	7.8	96.16	5.2	1.46	1.5	2.91	3.06	12.5	3.17	331	184	97.5	28.8	27.2	0.98	66.8	71	39.8	26.5	123.5	35.3	30.5
0	33	2	2	1	2	1	134	80	1	0	5.4	127.35	5.33	2.03	0.93	3.6	3.76	11	0.98	374	165	67.9	24.9	21	0.86	50.7	53.6	30.4	14.3	56.2	32.4	29.1
0	43	2	2	5	2	2	128	83	1	0	7	108	5.74	2.42	1.07	4.47	3.31	13.6	1.02	432	161	65.3	25.2	18.7	0.85	50.3	53.1	30	12.2	47.1	31.4	27.9
0	37	2	2	10	2	2	110	76	1	1	13.1	113.94	3.8	0.5	1.57	1.71	2.86	12.7	1.67	299	170	78.3	27.1	33.3	1.01	49.2	52.2	28.9	26.1	129	33.5	28.6
0	29	2	2	4	2	1	135	70	0	0	10.4	133.77	4.35	2.73	0.58	2.8	2.85	12.6	1.5	351.5	170	71.8	24.8	22.6	0.9	52.6	55.6	31.1	16.2	72.9	32	28.7
0	58	1	2	1	2	1	124	87	0	0	14	116.48	5.76	1.15	1.07	3.8	2.8	11.9	2.35	189	160	56.9	22.2	17.5	0.78	44.3	46.9	25.2	10	50.9	27.5	25.2
0	40	2	2	2	2	1	118	74	0	0	5.8	122.11	4.15	2.45	0.94	2.07	2.635	11.063	0.969	394	164	58	21.6	18.1	0.88	44.9	47.5	26.2	10.5	49.5	28.7	26
0	46	1	1	7	2	2	153	95	1	1	5.9	110.22	3.99	1.81	0.99	2.33	3.01	11.5	2.76	270	164	58	21.6	18.1	0.88	44.9	47.5	26.2	10.5	49.5	28.7	26
0	53	1	1	8	2	1	109	75	0	0	7.2	61.61	4.62	1.55	1.21	2.64	2.7	10.22	1.78	518	174	78	25.8	23.8	0.9	56.1	59.5	33.3	18.5	82.1	32.5	28.7
0	34	1	1	1	2	1	130	89	0	0	8.3	111.66	5.78	5.27	0.96	3.64	2.95	11.69	0.85	436	180	77.1	23.8	21.6	0.85	57.1	60.5	34.1	16.6	67.9	31.3	27.8
0	78	1	2	11	1	2	110	60	1	1	8.8	83.07	3.08	2.21	0.65	1.82	3.12	10.6	1.65	298	165	65	23.9	23.7	0.89	46.8	49.6	27.1	15.4	74.4	30.2	27
0	60	2	2	1	2	1	140	90	0	0	12	84.22	4.25	3.42	0.86	2.09	2.6	12.9	0.82	310	165	62.2	22.8	21.4	0.85	46.2	48.9	26.8	13.3	61.3	29.6	26.7
0	67	2	2	15	2	1	124	74	1	1	6.7	98.89	3.21	0.99	0.69	1.99	3.47	12.5	2.78	268	171	79.4	27.2	28.2	0.91	53.8	57	31.6	22.4	98.6	32.6	28.4
0	58	2	2	10	1	2	150	84	0	1	6.3	109.2	3.51	1.13	0.95	2.12	3.22	14.6	1.05	281	173	66.9	22.4	22.7	0.94	48.8	51.7	28.2	15.2	78.7	29.6	26.6
0	61	2	2	20	2	2	140	90	1	1	5.2	29.34	2.83	0.9	1.03	1.13	2.97	12.2	2.27	319	172	85.3	28.8	33.8	0.92	53.4	56.5	31.2	28.8	130.5	33.4	28.5
0	48	2	2	9	2	2	122	80	0	0	9.7	107.36	5.03	2.43	1.05	3.06	3.56	13.5	6.41	287	173	72.6	24.3	26.4	0.94	50.4	53.4	29.1	19.2	94.8	30.6	27.1
0	75	2	2	24	1	1	130	70	1	1	8.1	87.25	2.87	0.7	1.29	1.16	3.33	10.79	2.24	419	180	116.2	35.9	35.7	1.13	70.7	74.7	41.8	41.5	205.6	38.9	32.6
0	76	2	2	22	2	1	141	73	1	1	10.1	85.66	5.03	0.99	1.01	3.59	3.05	11.9	4.9	275	167	71.5	25.6	24.9	0.94	50.9	53.7	29.7	17.8	85.1	32.6	29.4
0	22	2	2	1	2	1	127	97	0	0	8.2	132.05	7.21	4.68	1.36	4.9	2.95	12.2	3.21	633	160	71.2	27.8	38.5	1	41.4	43.8	23.7	27.4	150.6	32.6	27.4
0	61	2	2	0.04	1	1	147	92	0	0	10.3	109.41	2.99	1.47	0.89	1.56	3.21	13.4	3.3	306	171	84	28.7	33.4	1.02	52.6	55.9	30.9	28.1	140.7	35	30
0	68	1	2	6	1	1	158	78	1	0	6.8	108.4	2.74	1.29	0.78	1.19	3.48	12.4	4.1	265	167	57.6	20.7	25.3	0.84	40.6	43.1	23.1	14.5	67.1	27.4	24.4
0	53	2	1	13	2	2	117	79	1	0	9.1	120.87	6.03	1.07	1.61	3.61	2.94	13.5	1.65	262	170	58.4	20.2	24.4	0.85	41.7	44.2	23.7	14.2	68.1	27.2	24.3
0	51	1	1	8	2	1	117	83	0	0	10.4	109.19	5.32	1.41	1.07	3.44	3.08	15.5	1.37	274	166	75.8	27.5	29.9	0.97	50.3	53.2	29.6	22.6	101.9	34	29.5
0	60	1	2	8	2	1	160	90	1	1	6.1	96.95	4.19	1.32	0.88	2.51	3.77	11.6	0.42	364	170	63.5	22	17.2	0.85	49.7	52.6	29.2	10.9	49.3	28.6	25.8
0	37	2	2	2	2	2	131	95	1	0	10.6	125.62	4.52	3.11	0.99	2.9	2.99	12.23	2.15	410	172	64	21.6	15.3	0.83	51.1	54.2	29.1	9.8	57.3	28.8	27.3
0	62	1	1	8	1	1	130	84	1	0	8	97.9	3.14	1.64	1.04	1.29	2.99	14.8	1.5	262	173	80.2	26.8	31.4	0.95	51.8	55	30.6	25.2	112.9	32.8	28.1
0	31	2	2	3	2	2	138	90	1	1	7.8	105.46	5.63	1.16	1.16	3.64	3.33	13.1	3.91	325	168	66.7	23.6	23.5	0.94	48.2	51.1	28.3	15.6	74.5	30.9	27.4
0	61	1	2	7	1	2	121	75	0	1	12.3	74.41	5.28	1.03	1.37	3.32	2.76	12	1.02	448	160	65.5	25.6	25.2	0.85	46.2	49	26.7	16.5	75	31.7	28.5
0	36	1	2	1	2	1	100	71	0	0	12.3	135	4.8	1.14	0.97	3.49	2.78	12.33	3.5	367	165	74.7	27.4	24.7	0.87	53.1	56.2	31.7	18.5	74.5	34	30.2
0	52	1	1	12	2	1	118	75	1	0	11.7	108.42	5.23	1.03	1.19	3.65	2.91	13.8	1.14	350	162	63.1	24	22.5	0.86	46.2	48.9	26.3	14.2	73.6	29.9	27.1
0	35	2	2	1	2	2	135	99	0	0	7.8	122.97	4.66	2.6	0.93	3.19	3.4	10.4	2.02	504	177	93.3	29.8	35.3	1.01	56.7	60.3	33.8	33	156.1	35.4	29.3
0	71	1	1	12	2	1	119	74	1	0	10.8	102.81	3.1	2.32	0.76	1.71	2.65	14.6	2.46	318	160	81.8	32	37.3	1	48.5	51.3	28.6	30.5	152.5	36.9	30.8
1	37	2	2	3	2	1	131	85	0	0	12.3	128.41	5.03	2.12	1.44	2.7	3.08	12.8	0.79	351	169	74.5	26.1	24.6	0.9	53	56.2	31	18.3	84.6	32.8	29.4
1	60	2	2	8	2	2	135	80	0	1	7.3	97.51	3.75	1.13	1.32	1.61	2.64	14.3	1.23	336	178	104	32.8	35.9	1.07	62.9	66.7	37.3	37.3	182.8	38.1	32.1
1	69	2	2	12	1	2	114	70	1	1	6.8	50.3	4.1	0.81	1.23	2.05	2.93	12.01	1.6	423	176	85.3	27.5	27.5	0.95	58.3	61.8	34.9	23.5	102.8	35.5	31.4
1	57	2	2	7	2	1	132	82	1	1	9.4	108.35	4.7	1.76	1.04	3.05	2.71	13.2	1.71	359	164	69	25.7	26.9	0.86	47.4	50.4	27.6	18.6	80.4	31.7	27.9
1	60	2	2	13	1	1	122	90	1	0	6.8	103.19	3.03	0.69	0.89	1.5	2.7	10.7	1.65	296	169	75	26.3	24.5	0.9	53.5	56.6	31.4	18.4	83.8	32.6	29.1
1	51	1	2	12	2	1	118	80	1	1	6.7	103.27	6.97	1.96	1.37	4.64	3.14	13.3	2.92	528	165	79.9	29.3	33.2	0.95	50.4	53.3	29.4	26.6	125.6	34.2	29.4
1	83	2	2	5	1	2	118	63	0	0	11.6	96.06	5.07	0.93	1.15	3.26	2.1	13.2	1.35	439	167	57.7	20.7	17.5	0.87	45.1	47.6	26.6	10.1	42.1	28.6	26.1
1	53	2	2	18	2	1	130	80	1	1	6.7	101.25	2.8	1.73	0.7	1.43	3.36	13.8	2.95	312	170	82.2	28.4	29.8	0.99	54.5	57.7	32	24.5	114.8	34.9	30.5
1	63	2	2	8	1	1	118	79	1	0	7.4	100.41	3.3	1.03	1.08	1.47	2.65	12.1	5.94	232	172	68.5	23.2	13.5	0.82	55.8	59.2	32.9	9.3	44.9	30.5	28.6
1	59	1	2	6	2	1	120	70	1	0	10.6	100.53	8.05	2.89	1.19	5.05	2.83	13.7	1.88	304	178	88.3	27.9	33.6	1.07	55.2	58.6	33.3	29.7	143.2	36.9	31.5
1	59	1	2	8	2	2	131	83	1	1	10.2	106.85	5.55	1.02	1.08	3.68	3.48	12.8	2.05	169	175	67.6	22.1	18.5	0.9	52	55.1	30.4	12.5	62.3	30.1	27.7
1	61	1	2	1	1	2	143	83	0	0	13.3	109.41	3.48	0.66	1.05	1.94	3.45	12.9	2.96	247	170	78.9	27.3	32	0.95	50.6	53.6	29.3	25.3	120	32.8	28.4
1	45	1	1	2	1	2	140	87	1	0	7	133.31	2.63	1.54	0.84	0.93	3.29	10.7	1.92	203	166	60.5	22	21.9	0.86	44.5	47.2	25.2	13.3	69.9	28.1	25.4
1	48	2	1	10	1	1	130	80	1	0	9.4	118.94	6.11	1.88	1.55	3.57	2.83	9.14	3.41	446	164	74	27.5	33.1	0.93	46.7	49.5	27.6	24.5	109.5	33.7	28.8
1	59	2	1	16	2	2	130	80	1	0	8.4	111.65	4.91	2.38	0.94	2.98	3.01	12.2	2.95	239	169	82.8	29	32.6	0.99	52.7	55.8	31.1	27	127.3	34.5	29.4
1	58	2	2	5	2	2	140	92	1	0	7.3	110.1	4.74	0.71	1.13	2.86	3.28	15.1	1.33	257	170	75.7	26.2	24	0.84	54.2	57.5	32.1	18.2	75.1	31.6	27.8
1	60	2	2	10	1	2	124	72	1	1	7	103.89	5.14	1.2	1.14	3.06	3.01	11.9	1.27	269	165	57.5	21.1	24	0.86	41.2	43.7	23.9	13.8	59.6	27.9	24.6
1	46	1	1	7	2	1	121	78	1	1	8.7	89.15	4.33	2.18	0.91	2.35	3.16	10.7	4.97	366	169	96	33.6	43.1	1.04	51.6	54.6	30.1	41.4	207	38.1	31.3
1	66	2	2	24	2	1	127	71	1	1	7.2	103.23	3.57	1.06	1.04	1.84	2.91	12.7	0.892	375	166	79.9	29	35.4	0.96	48.6	51.6	28.7	28.3	134.2	34.2	28.7
1	60	1	1	10	1	2	160	90	1	0	8.4	58.11	6.25	1.17	1.91	3.53	2.88	14.9	1.61	313.2	164	81.8	30.4	41	0.95	45.8	48.3	25.6	33.5	176	31.6	26.3
1	76	2	2	18	2	2	127	90	1	1	8.3	101.49	3.98	1.42	1.02	2.15	3.17	13.7	3.37	347	167	65.7	23.6	23	0.95	48	50.6	28	15.1	73.6	31.6	28.8
1	59	2	2	17	2	2	107	71	1	1	8.4	102.6	4.8	2.34	0.99	2.32	3.09	12.2	2.52	373	180	99.8	30.8	31.1	0.95	64.7	68.8	39	31	130.3	36.4	30.9
1	62	1	1	20	2	1	133	81	1	1	8.8	92.96	4.62	3.03	0.97	2.45	2.75	12.8	2.21	360.6	175	64.4	21	22.7	0.96	47.1	49.8	27.5	14.6	71.8	29.5	26.6
1	64	1	1	19	2	2	143	81	1	1	6.4	80.2	4.33	1.72	1.08	2.77	2.85	14.1	1.12	386	172	73.7	24.9	24.6	0.81	52.5	55.6	29.5	18.1	88	28.4	25.7
1	56	1	2	17	2	1	134	84	1	0	6.2	102.75	2.59	0.91	0.64	1.35	2.81	12	2.63	298	172	84.7	28.6	29.6	0.95	56.5	59.7	33.4	25	109.6	34.8	30.6
1	58	1	1	3	1	2	116	82	1	0	12	80.84	2.85	1.52	0.93	1.39	2.53	12.3	2.37	307	173	79	26.4	36.1	1.03	47.5	50.4	27.9	28.6	147.7	34.2	29.1
1	65	2	2	16	1	2	145	88	1	1	9.9	99.63	4.05	1.23	1.19	2.13	2.97	12.97	0.386	321	173	75.8	25.3	26	0.95	53	56.1	31.6	19.7	86.3	33.1	29.1
1	30	1	1	1	2	2	142	74	0	0	10.5	133.87	3.74	2.22	0.64	2.27	3.48	14.1	1.7	503	167	61.8	22.2	17.9	0.83	47.8	50.7	28.2	11.1	46.2	28.8	26
1	40	2	2	2	2	2	114	78	0	0	10	114.88	5.73	3.14	1.26	3.36	2.54	12.1	2.32	354	168	64	22.7	27.1	0.95	44.1	46.7	25.6	17.3	81.4	30.1	26.5
1	69	1	2	22	2	1	172	88	1	1	7	41.69	5.18	1.39	1.22	2.81	2.92	10.7	1.99	394	169	69.4	24.3	23.8	0.83	49.9	52.9	29.2	16.5	71	30.3	27
1	56	2	2	2	1	2	145	82	1	0	9.1	103.39	5.67	2.17	0.92	3.59	3.2	11.8	2.03	320	169	69.7	24.4	23.8	0.9	50.2	53.1	29.9	16.6	70.2	31.5	27.9
1	37	1	2	3	2	1	121	79	1	0	6.1	119.63	4.61	4.66	0.9	2.8	2.98	13.3	4.04	373	172	61.4	20.8	26.6	0.92	42.5	45.1	24.3	16.3	79.3	28.1	24.9
1	58	1	2	5	2	1	130	80	1	0	9.1	103.27	4.04	4.01	1.08	1.71	2.93	13.4	3.01	379	172	89.6	30.3	40.4	1.05	50.3	53.4	29.5	36.2	186.5	36.8	30.8
1	58	2	2	4	2	1	116	82	1	0	6.7	100.08	3.6	1.1	0.9	2.07	2.88	11.4	1.87	409	165	60.5	22.2	18.5	0.81	46.6	49.3	26.9	11.2	51.9	28.5	26.1
1	61	1	2	5	2	1	140	80	1	0	7.2	101.07	2.78	1.58	0.72	1.41	2.98	12.5	1.76	251	176	74.4	24	24	0.9	53.6	56.6	30.9	17.8	88.1	31.2	28.5
1	69	2	2	19	1	2	140	90	1	0	6	93.78	5.44	0.83	1.41	3.06	2.62	11.1	4.02	323	171	84.2	28.8	32.6	1.01	53.6	56.8	31.5	27.4	135.1	35.6	30.9
1	50	1	1	8	1	1	131	91	1	1	11.3	110.7	7.15	1.38	1.11	5.09	3.04	13.5	1.25	344	176	89.7	29	34.1	1.1	55.8	59.1	33.1	30.6	156.1	36	30.8
1	60	1	1	12	1	2	140	80	1	0	6.7	99.9	3.08	0.68	1.23	1.1	3.35	13.6	1.43	289	177	76.2	24.3	24.8	1	54.1	57.3	32	18.9	92.2	32.5	28.6
1	60	1	2	8	1	2	130	92	1	1	9.4	94.43	2.8	1.82	0.85	1.25	3.04	12.1	3.23	169	162	94.5	36	37.5	0.9	55.8	59	33	35.5	152.1	38.5	32.2
1	58	1	2	16	1	2	105	67	1	1	6.6	101	2.7	1.05	0.75	1.38	4.59	17.7	2.14	228	157	58.2	23.6	21.8	0.77	42.8	45.5	24.2	12.7	61.1	28.7	26
1	62	1	2	8	2	2	146	90	1	0	8.4	101.75	3.84	2.62	0.79	2.14	3.44	12.3	2.06	287	180	95.7	29.5	30.6	0.89	62.7	66.4	37.2	29.3	117	34.2	29.5
1	65	2	2	5	1	2	114	74	1	0	7	109.94	2.55	0.84	0.79	1.28	3.25	16.3	1.99	275	168	73.1	25.9	19.8	0.87	55.5	58.6	33.3	14.5	59.3	33.1	30
1	85	1	2	12	1	1	156	86	0	0	7.7	82.19	5.3	1.65	1.39	2.75	2.91	14.3	1.93	305.1	166	74.8	27.1	27.4	0.88	51.3	54.3	30.4	20.5	83.3	32.8	28.5
1	52	1	2	1	1	2	200	120	0	0	8.7	105.02	3.38	2.87	0.78	1.87	3.38	13.8	1.12	303	173	81.2	27.1	29.9	0.98	53.8	57	31.5	24.2	111.3	32.2	27.5
1	48	2	2	1	2	1	116	82	1	0	5.9	115.42	2.31	0.58	0.77	0.94	2.89	13.7	1.08	227	177	70.5	22.5	9.4	0.75	60.3	63.9	36	6.6	25.6	29.8	28.4
1	62	2	2	10	2	1	131	81	1	0	8.1	99.13	3.79	2.18	0.98	2.03	3.47	12.8	1.27	354	154	54	22.8	30.1	0.82	35.6	37.8	19.9	16.2	72.7	27.9	24.2
1	56	1	2	12	1	2	113	81	1	1	8	103.39	1.59	1.24	0.62	0.38	2.7	14	0.626	265	170	74.7	25.8	29.5	0.94	49.7	52.7	28.9	22	102.1	32	28
1	27	2	2	2	2	2	130	90	0	0	6.8	130.11	2.85	2.35	0.73	1.44	3.22	13.7	0.962	365	172	75.8	25.6	27.3	0.94	52.1	55.1	30.3	20.7	97.1	32.2	28.8
1	55	2	1	13	2	1	134	83	1	0	6.8	113.23	3.53	1.14	1.02	1.86	3.08	14	1.63	260	161	65.7	25.3	29.9	0.81	43.4	46.1	25	19.6	77.4	28.9	24.6
1	61	2	2	17	1	2	139	94	1	1	6.8	103.88	4.95	1.69	1.16	2.97	2.49	9.75	4.99	461	167	64.5	23.1	25.8	0.9	45.2	47.8	25.9	16.7	82.1	29.9	26.8
1	56	1	2	20	2	2	143	89	1	1	9.6	116.94	3.29	0.75	1.01	1.43	2.97	11.8	2.7	334	168	81.1	28.7	31.6	0.98	52.3	55.5	30.3	25.6	126.7	34.5	30.1
1	52	1	1	7	2	2	115	80	1	1	9.7	114.7	3.67	0.98	0.99	1.6	2.64	12.2	2.9	260	176	108.3	35	34.5	1.01	67.1	71	40.8	37.3	163.7	39.4	33.1
1	63	2	2	3	1	2	110	80	0	0	7.9	107.89	6.1	1.05	2.25	2.98	2.81	12.5	2.04	240	175	79.3	25.9	26.2	0.94	55.3	58.5	32.7	20.8	95.3	33.6	30.1
1	66	2	2	20	1	2	120	80	1	1	12.9	91.25	5.48	1.04	1.57	3.13	2.45	12.8	2.8	269	166.5	64	23.1	33.9	1.06	40	42.3	22.8	21.7	123.9	30.7	26.7
1	56	1	2	9	2	2	129	73	1	0	6.6	105.03	4.22	1.05	1.1	2.26	2.86	13.7	0.932	329.4	165	64.4	23.7	27.6	0.92	44.1	46.6	25.8	17.8	76.7	30.6	26.8
1	63	2	1	18	1	2	160	93	1	1	9.5	98.51	5.71	0.72	1.13	4.04	2.75	12.01	1.73	236	176	64	20.7	15.4	0.88	51.2	54.2	30.2	9.8	46.3	29.3	27.3
1	60	1	2	14	2	2	113	77	1	1	9.8	99.98	4.21	0.7	1.04	2.8	3.7	12.4	0.83	303	188	99.6	28.2	32.1	1	63.4	67.6	37.6	32	148.1	34.4	29
1	54	1	1	16	2	1	152	85	1	1	6.3	113.23	3.05	0.58	0.96	1.59	3.11	11.3	3.51	323	169	67.3	23.6	24.3	0.9	48.1	50.9	28.2	16.4	73.1	30.3	26.9
1	59	2	2	1	1	1	127	82	0	0	9.7	106.09	4.96	2.35	0.93	2.87	2.46	13.1	0.646	305	170	94.7	32.8	33.7	1.01	59.5	62.8	35.5	31.9	147	38.3	33
1	32	2	2	1	2	2	120	73	0	0	10.5	125.62	5.44	3.38	0.93	3.29	3.09	14.7	1.26	350	163	72.1	27.1	38.9	1.01	41.5	44	24.2	28.1	149.8	34.6	29.3
1	47	1	2	2	2	2	132	92	0	0	11.5	115.42	6.39	3.1	1.03	4.51	3.21	12.39	1.72	356	159	72.5	28.7	32.2	0.92	46.5	49.1	27.2	23.4	105.1	34.2	29.7
1	64	1	2	1	2	2	120	80	0	0	12.9	102.44	4.15	0.79	1.17	2.32	2.59	13.2	3.37	215	168	78.1	27.7	28	0.88	53.1	56.2	32.1	21.9	82.3	33.8	29.2
1	24	2	2	1	2	1	135	90	0	0	6.4	144.19	3.91	0.79	1.25	1.88	2.62	11.3	0.922	278	176	69.5	22.4	19.5	0.88	52.8	55.9	31.4	13.6	59.2	30.5	27.7
1	43	2	2	1	2	2	117	90	0	0	11	110.53	4.37	2.56	0.98	2.27	2.88	11.5	3.41	538	170	79.9	27.6	28.7	0.96	53.8	57	32	22.9	100.5	34.9	30.4
1	47	2	2	1	2	1	121	87	0	0	9	113.82	4.37	5.16	1	1.17	3.33	13	1.97	322	170	71.3	24.7	24.8	0.94	50.7	53.6	29.8	17.7	82.9	32.1	28.7
1	66	1	1	1	1	2	123	85	0	0	11.4	98.96	5.67	1.47	1.19	3.41	2.82	13.4	1.95	303	178	93.3	29.4	32.8	1.01	58.9	62.7	34.4	30.6	150.8	34.2	29
1	50	2	2	1	2	2	118	76	0	0	11.9	104.61	3.55	1.93	0.85	1.85	2.82	12.01	3.96	319	170	64.3	22.2	18.1	0.85	49.8	52.7	29.2	11.6	52.9	29.9	27.5
1	53	1	1	1	1	2	130	84	0	0	9.5	117.49	6.16	3.57	1.28	3.05	2.88	10.1	0.863	308	165	75.8	27.8	23.4	0.9	55	58.1	32.8	17.7	77.4	34.3	30.7
1	34	1	2	1	2	1	130	89	0	0	9.1	124.71	6.29	6.65	1.26	2.95	2.98	12.8	1.37	463	170	73.8	25.5	25.7	0.93	51.8	54.8	30.6	19	86.2	33	29.5
1	62	2	2	1	2	2	118	79	0	0	11.2	117.47	6	1.28	1.24	4.07	2.69	10.57	2.53	271	170	71.1	24.6	23.1	0.85	51.7	54.7	29.8	16.4	77.8	30.7	27.8
1	67	1	2	7	1	2	154	83	0	0	9	95.64	4.59	1.74	0.78	3.08	2.39	10.9	2.07	288.2	165	55.3	20.3	14.2	0.76	44.8	47.4	26	7.9	32.8	26.6	24.6
1	75	2	2	20	2	1	127	70	1	1	7.7	72.21	2.91	1.14	1.02	1.04	2.82	13.6	1.62	543	173	74	24.7	24.3	0.94	52.8	56	30.7	18	90.3	31.2	27.7
1	72	2	2	17	1	2	117	74	1	0	6	94.26	4.07	1.62	0.88	2.33	2.67	12.01	2.09	374	174	59.4	19.6	14.6	0.88	48	50.7	27.5	8.7	49.2	28.6	27.5
1	56	2	1	7	1	1	123	80	0	1	5.3	107.59	5.12	2.45	1.25	2.57	3.28	13	1.08	356	169	82.4	28.9	33.7	0.91	51.7	54.6	29.8	27.8	128.5	33.3	29.2
1	64	1	2	23	1	1	142	83	1	1	6.1	11.31	4.88	1.54	0.96	2.64	2.06	10.9	7.93	432.7	177	94.1	30	31.3	1.02	61.1	64.7	36.2	29.4	138.5	36.5	31.8
1	60	1	1	20	1	1	105	64	1	1	7.3	92.78	3.62	2.85	0.92	1.6	3.26	14.2	2.1	6.8	171	74.9	25.6	18.6	0.87	57.7	61	33.9	13.9	67.8	32.4	29.8
1	68	1	2	11	2	2	125	72	0	1	7.2	100.29	3.55	1.53	0.88	1.72	3.28	12	1.32	316	168	69.6	24.7	27.3	0.91	47.8	50.6	28.3	19	79.9	31.9	27.9
1	69	2	2	17	1	2	135	75	1	1	8	42.69	3.06	0.68	1.04	1.2	2.29	11.9	5.71	459	164	74.2	27.6	33.1	0.94	47	49.6	27	24.6	119.2	32.4	28.2
1	65	1	1	16	2	2	128	83	0	1	7.9	96.45	4.12	1.98	0.97	2.26	3.02	12.01	1.39	346	175	63.7	20.8	23.5	1	45.9	48.7	26.5	15	80.6	29.5	26.6
1	59	2	2	20	1	1	128	85	1	1	11	109.25	2.68	0.65	1.41	0.73	3.01	13.7	0.49	279	176	77	24.9	24.3	0.87	55	58.3	31.7	18.7	89.7	29.8	26.4
1	52	2	2	12	1	2	154	86	0	1	7.6	77.02	4.17	1.14	1.19	2.28	2.52	11	1.21	233	170	66.2	22.9	19.9	0.83	50.1	53	29.1	13.2	60.8	29.9	27.4
1	54	2	2	14	1	2	148	88	1	1	6.8	108.36	3.83	2.23	1.06	1.92	3.05	13.9	0.772	342	180	110	34	37.6	1.07	64.6	68.6	37.9	41.4	202.5	35.4	28.6
1	65	1	1	14	1	2	159	90	1	1	8.9	105.55	5.71	1.05	1.31	3.19	2.73	13.8	2.81	380	175	91.3	29.8	27.6	0.96	62.5	66.1	37.5	25.2	111	37.3	33.1
1	51	1	2	7	1	1	158	108	1	1	7.8	106.42	5.44	3.32	1.02	3.65	3.25	11.8	2.74	324	170	94.1	32.6	34.3	0.98	58.3	61.8	33	32.3	163.2	33.5	28.8
1	52	2	2	15	2	2	121	75	1	1	7.5	103.15	3.85	1.55	1.01	2.17	2.89	11.8	1.84	322	167	85.7	30.7	37.6	0.98	50.5	53.5	29.3	32.2	161.2	34.5	29
1	68	1	2	12	2	1	154	85	0	1	7.4	23.62	3.31	0.89	1.11	1.43	2.65	10.4	7.22	385	162	55.3	21.1	20.2	0.86	41.6	44.1	23.5	11.2	61.2	27.4	24.9
1	59	1	2	5	1	1	133	94	0	1	6.5	92.78	5.03	1.11	1.1	3.08	2.88	13.1	2.1	309	168	59.2	21	17.6	0.87	46.1	48.8	27.2	10.4	44.3	28.4	25.7
1	67	1	1	13	2	2	115	77	1	1	6.2	59.54	3.6	2.47	0.83	1.66	3.22	12.1	2.58	323	168	74.9	26.5	24	0.84	53.6	56.9	31.8	18	73.9	32.1	28.3
1	65	1	2	13	1	2	111	74	0	1	6.8	96.45	4.06	0.55	1.22	2.22	2.89	15.3	1.01	258	168	77.1	27.3	20.5	0.86	57.9	61.3	34.7	15.8	67.1	32.9	29.3
1	64	2	2	1	2	1	156	88	0	1	6.2	60.15	3.32	0.93	1.3	1.35	2.75	10.4	4.35	820	167	78.4	28.1	29.7	0.95	52.1	55.1	30.6	23.3	105	34.6	30.4
1	54	1	2	7	1	2	164	113	0	1	11.7	117.77	4.82	1.78	0.97	3.12	2.88	12.3	2.04	305	168	69.5	24.6	27.7	0.9	47.4	50.2	27.7	19.3	83.5	31.2	27.3
1	50	1	2	11	2	2	119	75	1	1	7.3	102.68	4.05	4.47	0.86	2.14	2.85	11.8	0.891	342	172	82.7	28	31.1	0.97	53.8	56.9	31.9	25.8	115.5	34.5	30
1	18	2	2	3	2	1	140	90	0	0	7.2	140.51	5.77	2.36	1.02	3.7	3.28	13.2	1.47	674	170	72.1	24.9	24.1	0.92	51.6	54.7	30.3	17.4	82.5	31.8	28.3
1	53	1	1	4	1	1	150	100	1	1	5.9	84.87	5.06	1.15	1.24	2.81	2.88	12.5	2.24	366	171	83.4	28.5	29.7	0.87	55.4	58.6	32.9	24.8	95.6	34.1	29.8
1	66	2	2	7	2	2	153	102	1	1	7	97	3.23	1.49	0.69	1.83	2.98	12.1	1.76	274	165	70.1	25.7	20.9	0.85	52.6	55.5	31.5	14.6	57.4	32.6	29.5
1	59	2	2	4	1	2	144	92	1	0	10.5	115.67	4.48	0.79	1.93	2.46	2.98	14.1	1.51	213	171	82.9	28.4	26.9	0.92	57.2	60.6	33.8	22.3	99.7	35	31.2
1	32	1	1	1	2	2	126	94	0	0	14.5	130.11	5.91	3.51	1	3.8	2.84	13.8	0.728	354	183	86.2	25.7	21.8	0.93	63.7	67.4	37.7	18.8	90.9	33.2	30.1
1	53	2	2	1	2	2	126	84	0	0	9	109.13	4.15	1.79	0.86	2.52	3.1	14.9	1.83	269	173	93.3	31.2	39.2	1.03	53.4	56.7	31.5	36.6	182.1	36.6	30.4
1	53	1	2	10	2	1	160	95	0	0	6.8	103.65	4.71	1.71	1.02	3.12	3.48	14.7	2.62	398	169	87.9	30.8	34	0.95	54.6	58	32.5	29.9	133.6	35.6	29.9
1	74	2	2	2	2	2	150	96	0	0	5.9	88.6	4.16	0.69	1.5	1.9	3.23	10.9	4.07	310	170	73.6	25.5	22.9	0.96	53.7	56.8	32.2	16.8	75.6	33.4	29.9
1	55	2	2	6	2	2	120	78	1	1	6.8	102.21	3.92	1.58	0.66	2.76	2.84	11.5	2.31	300	165	75.4	27.7	27.7	0.91	51.4	54.5	30.4	20.9	89.5	34	29.8
1	67	2	1	7	1	1	142	90	1	1	9.2	90.1	3.24	1.4	0.89	1.56	2.99	12.4	1.27	315	178	70.6	22.3	14.2	0.84	57.3	60.6	34.1	10	43.4	30.6	28.5
1	48	2	2	8	2	2	136	80	1	1	8.5	98.51	5.34	4.6	1	3.29	3.1	14	1.48	368	168	82.9	29.4	38.4	1.03	48.3	51.1	28	31.8	167	35	29.8
1	46	2	2	6	2	2	120	80	0	1	7.4	111.56	5.05	2.95	0.92	2.73	3.28	13.1	2.2	433	177	91.6	29.2	29.7	1.01	60.8	64.4	36.1	27.2	125.5	35.2	30.5
1	57	2	2	1	2	2	145	87	0	0	11.5	101.49	6.39	0.87	1.56	3.88	2.73	11.01	5.52	252	160	63.8	24.9	13.7	0.74	52.2	55.1	29.2	8.7	53.9	29.9	29
1	59	1	1	3	2	2	149	97	1	0	6	118.85	5.08	2.71	1.13	3.28	3	14.6	2.53	441	170	73.3	25.4	21.7	0.89	54.1	57.4	31.8	15.9	76	31.4	28.1
1	57	2	2	3	2	2	114	84	1	0	8.2	107.59	3.82	2.05	0.74	2.43	2.99	13.8	0.7	267	165	65.2	23.9	32.7	0.94	41.2	43.9	23.4	21.3	111.1	30.6	26.5
1	53	1	2	10	2	2	142	92	0	1	7.6	86.69	4.46	1.56	1.02	2.85	3.18	13.2	1.57	406	168	67.1	23.8	28.4	0.91	45.2	48	25.6	19.1	96.3	29.6	26.2
1	64	1	1	26	1	1	136	93	0	1	10.1	43.08	3.09	1.85	0.87	1.72	2.71	10	1.46	552	170	79.7	27.6	29.6	0.99	53.1	56.1	31.4	23.6	107.9	34.9	30.7
1	62	2	2	12	2	2	130	84	0	1	11.5	119.8	4.8	0.89	1.21	3.07	3.16	13.4	1.18	248	172	77.5	26.2	30.4	0.94	50.9	53.9	29.9	23.6	104.3	32.6	28.4
1	59	2	2	18	2	2	139	84	1	1	8.2	101.88	3.57	1.79	0.85	1.88	3.28	13.2	0.94	265	170	69.7	24.1	27.6	0.91	47.6	50.5	27.9	19.2	83.2	31.2	27.2
1	56	2	2	16	2	1	114	74	1	1	7.9	107.59	3.69	1.25	1.09	2.12	3.31	11.8	2.04	279	165	77	28.3	35.3	0.99	47.1	49.9	27.2	27.1	139.8	33.9	29
1	35	2	2	1	2	1	117	76	0	0	6.5	128.34	4.64	1.1	0.89	3.18	3.7	13.5	1.84	320	171	76.4	26.1	27.8	0.9	52.1	55.2	30.7	21.2	91.4	32.4	28.3
1	52	2	2	1	2	2	136	88	0	0	11.4	113.9	4.26	1.28	0.87	2.92	3.48	13.2	1.97	243	170	88.4	30.6	33.7	0.98	55.4	58.6	33.2	29.8	134.3	37	31.6
1	53	2	2	10	2	1	124	81	1	0	7	123.96	5.06	1.74	0.85	3.55	2.74	12.3	3.05	245	164	79.1	29.4	37.4	0.97	46.6	49.5	27.4	29.6	145.6	35.2	29.4
1	39	1	2	3	1	2	135	85	1	1	6	123.91	4.68	2.32	1.02	2.56	3.39	11.4	1.98	322	168	75	26.6	31.7	0.84	48.5	51.2	27.5	23.8	105.6	29.9	26.2
1	79	1	2	10	2	2	101	64	1	0	7	103.27	3.15	1.57	1.44	1.21	3.04	14.2	1.65	327	170	77.8	26.9	24.4	0.89	55.6	58.8	33.2	19	80.6	33.4	29.5
1	55	2	2	5	2	2	130	79	1	1	7.9	100.41	4.59	1.4	0.9	2.9	2.88	12.2	4.15	348	168	100.4	35.6	34.6	0.97	62.2	65.7	37.8	34.7	147.4	40.2	33.9
1	60	1	1	10	2	2	157	100	1	1	5.6	92.78	4.09	2.78	0.82	2.6	2.93	12.8	1.06	401	169	78.2	27.4	33.2	0.92	49.2	52.2	28.4	26	124	31.7	27.2
1	57	1	1	10	2	2	142	80	1	0	7.6	102.33	3.31	0.76	1.4	1.34	3.05	13.2	1.56	283	167	72.6	26	34.8	0.89	44.7	47.4	25.7	25.2	118.9	31.6	27
1	69	2	2	20	1	2	160	85	1	1	10.9	26.56	6.46	3.07	1.2	3.34	2.68	9.38	2.11	315	173	76.4	25.5	19.1	0.73	58.7	61.8	32.9	14.6	71.3	27.2	25.5
1	35	1	1	1	2	1	125	88	0	0	12.8	139.38	3.7	0.62	1.41	1.73	2.71	14.3	0.64	273	170	87	30.1	30.4	0.9	57.1	60.5	34.3	26.5	104.2	35.3	30.2
1	45	1	2	16	2	1	123	80	1	1	5.5	126.52	2.57	0.75	0.97	1.05	2.94	11.6	2.17	415	160	70.1	27.4	31.8	0.92	45.2	47.8	26.4	22.3	99	33.5	28.9
1	59	1	2	9	2	2	150	82	1	1	9.4	109.25	3.99	0.73	1.14	2.1	2.6	14.1	1.28	313	171	90.8	31.1	33.7	0.98	56.7	60.2	34.1	30.6	137.6	36.6	30.8
1	68	1	2	13	2	2	150	90	1	1	6.8	92.73	2.32	1.02	0.69	1.07	3.3	12.8	1.8	441	179	66.9	20.9	18.3	0.8	51.5	54.7	29.9	12.2	56.7	27.6	25
1	67	2	2	2	1	2	140	87	1	0	12	108.4	5.91	1.47	1.09	4.39	2.62	14.6	0.74	216	174	68	22.5	13.4	0.8	55.6	58.9	32.8	9.1	40.7	29.8	27.9
1	28	1	1	1	2	2	131	84	1	0	7.8	117.4	5.99	3.09	0.95	4.09	3.4	12.5	0.47	355	178	83.5	26.4	28.9	0.99	56	59.4	33.4	24.1	108.4	34.5	30.1
1	75	2	2	7	1	2	148	86	1	1	7.1	59.54	4.37	1.4	1.03	2.41	3.17	11.8	1.82	355	181.5	76.9	23.3	24.8	0.92	54.6	57.9	31.6	19	94.5	31.1	28
1	58	1	1	23	2	2	150	90	1	1	6.8	102.6	3.18	1.72	0.87	1.6	3.49	13.6	0.96	291	172	63.6	21.5	24.3	0.85	45.4	48.2	26.1	15.4	72.2	28	24.8
1	60	1	2	1	2	2	119	76	0	0	6.9	107.63	5.07	1.27	1.11	3.27	3.24	13.7	1.09	250	150	55.6	24.7	28.3	0.87	37.7	39.9	21.6	15.7	68.3	30.2	26
1	57	1	2	21	2	2	119	80	1	1	5.8	107.59	3.37	0.88	0.97	1.67	3.08	12	0.85	297	173	75.5	25.2	19.8	0.88	57.2	60.5	34.1	15	67.2	32.2	29.1
1	56	2	2	3	2	2	155	88	0	0	8.69	114.23	6.78	3.25	1.27	3.95	2.95	12.9	1.71	383	171	70.4	24.1	29.7	0.97	46.7	49.5	27.2	20.9	97.4	31	27
