# Supplementary material for: Association of gender and metabolic factors with thyroid nodules in T2DM: a retrospective study
Source: PeerJ. 2025 Mar 26;13:e19068. doi: 10.7717/peerj.19068 (PMC11954462; doi:10.7717/peerj.19068)
Supplement: Supplemental Information 3 [file peerj-13-19068-s003.xlsx]

## Sheet: Sheet1
Thyroid nodule	Age (years)	DM course (years)	Smoking	Drinking	ASCVD(%)	History of DM	SBP(mmHg)	DBP(mmHg)	Metformin	Insulin	HbA1c (%)	eGFR (mL/min/1.73 m2)	TC(mmol/L)	TG(mmol/L)	HDLC(mmol/L)	LDLC(mmol/L)	FT3	FT4	TSH	UA	Age (years)	Weight	BMI (Body Mass Index)	PBF (Percent Body Fat)	WHR (Waist-Hip Ratio)	SLM (Soft Lean Mass)	FFM (Fat Free Mass)	SMM (Skeletal Muscle Mass)	VFA (Visceral Fat Area)	AC (Arm Circumference)	AMC (Arm Muscle Circumference)	Overweight(%)	Obesity(%)
0	48	1	2	2	2	2	148	94	0	0	9.6	109.91	7.23	1.23	1.62	4.03	2.4	11.2	2.64	156	48	56.6	24.5	31.8	0.86	36.4	38.6	20.6	84.3	29.7	25.5	1	0
1	46	1	2	2	2	1	112	74	0	0	11	127.79	4.72	1.96	1.11	3.02	3.08	14.9	1.92	198	46	67.7	24.9	35.7	0.92	41	43.6	23.3	124.9	30.1	25.6	1	0
0	38	1	2	2	2	1	138	90	0	0	11.7	135.17	5.02	1.93	1.07	2.98	3.23	14.6	1.97	343	38	77.1	28.3	41.1	0.96	42.6	45.4	24.9	161.3	32.9	26.5	1	1
0	57	1	2	2	1	1	137	84	0	0	15.7	107.6	4.47	1.15	1.18	2.48	2.44	13.8	7.25	251	57	64.4	25.8	39.3	0.92	36.7	39.1	20.6	140.1	30.1	24.9	1	0
0	39	11	2	2	2	1	130	100	0	0	7.2	122.11	6.77	0.82	1.16	4.67	2.7	12.6	2.22	278	39	57.8	23.2	29.7	0.89	38.2	40.6	22.3	69	29.8	25.5	0	0
0	29	1	2	2	2	2	113	74	0	0	12.1	146.99	3.88	2.06	0.78	2.53	2.77	11	1.41	393	29	95.4	33.8	47.1	0.97	47.4	50.5	27.6	211.8	36.6	28.9	1	1
0	53	14	2	2	2	2	119	84	1	0	8.7	117.16	4.67	0.7	1.13	2.99	2.76	15.7	2.05	179	53	60.5	22.8	28.5	0.91	41	43.3	23.5	78.1	29.6	26.1	0	0
0	69	17	2	2	1	2	130	74	1	1	7.6	50.71	2.23	1.75	1.03	0.48	3	14.1	2.33	314	69	56	23.6	34.2	0.95	34.6	36.8	19.9	97	30.2	25.5	0	0
1	74	10	2	2	2	1	142	90	1	1	3.1	95.44	5.34	1.65	1.05	3.44	3.28	11.4	1.19	330	74	69.5	28.2	45.8	1.02	35.4	37.7	19.9	189.5	32.3	26	1	1
1	63	14	2	2	1	2	130	66	0	1	6.1	96.44	3.83	0.95	1.35	1.57	3.22	14.1	1.42	226	63	73.5	31	43.9	0.88	39.1	41.3	22.1	161.8	33.6	27.5	1	1
0	69	16	2	2	2	1	120	72	0	0	6.3	88.22	5.48	0.92	1.76	3.03	2.81	13.1	4.34	338	69	59	24.2	36.4	0.89	35.3	37.5	20	112.8	29.1	24.3	1	0
1	70	17	2	2	2	2	146	66	1	0	8	94.17	5.81	2.1	1.37	3.19	2.85	12.4	2.18	303	70	53.6	21.5	26.3	0.85	37.3	39.5	21.1	65.5	26.8	23.4	0	0
1	46	15	2	2	2	1	120	84	0	1	7.7	120.11	5.05	0.83	1.68	2.4	2.83	13.6	3.79	203	46	70.4	30.9	43.4	0.92	37.4	39.9	21	166.2	33.3	26.7	1	1
1	64	10	2	2	1	1	189	102	0	0	12.6	68.17	3.9	1.55	1.01	2.12	2.94	14.7	3.98	329	64	52.4	21.8	34.7	0.91	32.2	34.2	18.1	97.1	27.9	23.8	0	0
1	54	23	2	2	1	1	146	95	1	1	9.2	110.81	7.13	1.9	1.8	4.06	2.71	18.2	0.849	270	54	48.1	21.1	30.2	0.84	31.6	33.6	17.5	68.1	26.5	22.9	0	0
1	57	1	2	2	2	2	126	79	0	0	6.1	96.64	4.41	1.36	0.95	2.78	2.45	13	1.61	394	57	67.4	26	26.5	0.88	46.9	49.6	27.5	74.7	32	28.3	1	0
1	40	3	2	2	2	1	123	81	0	0	5.6	112.67	4.96	1.98	0.9	3.15	2.65	13.1	1.14	268	40	74.3	28.3	36.2	0.91	44.6	47.4	26.1	126.2	33.8	28.5	1	1
1	61	10	2	2	2	2	135	87	1	0	6.7	108.72	4.7	2.94	1.03	2.42	2.76	9.87	7.01	214	61	52.5	19.8	25.5	0.84	36.8	39.1	20.8	62.8	25.7	22.5	0	0
1	59	3	2	2	2	1	133	84	1	0	12	106.1	4.56	1.85	0.86	2.91	3.18	13.5	3.86	394	59	86.4	34.6	45.5	1.07	44.6	47.1	25.8	210.6	38.2	30.9	1	1
0	40	5	2	2	1	2	134	98	1	0	8.4	134.65	9.51	25.08	1.5	2.95	2.64	11.2	3.35	313	40	75.4	30.2	33.9	0.93	47.1	49.8	27.4	120.4	33.7	28.6	1	1
0	60	16	2	2	1	1	98	69	1	1	8.7	84.96	4.14	2.23	0.93	2.47	2.5	11.15	4.3	357	60	64.2	27.1	42.9	0.98	34.6	36.7	19.4	162.7	32.6	27	1	0
0	74	8	2	2	1	2	157	75	1	0	10.4	59.44	3.55	1.11	1.21	1	2.68	12.3	5.24	323	74	59.3	23.8	28.8	0.86	39.8	42.2	22.2	83.8	29.5	26.4	0	0
1	67	20	2	2	2	1	127	71	1	1	8.5	93.77	4.25	0.8	0.9	2.59	2.3	12.16	2.02	239	67	71	31.6	44.4	0.96	37.3	39.5	20.9	177.8	34.3	27.9	1	1
0	70	11	2	2	1	1	140	70	1	0	10.2	100.63	4.78	1.18	1.4	2.12	2.28	14.1	0.999	168	70	65	27.1	37.6	0.94	38.1	40.6	21.3	138.5	31.2	26.2	1	0
0	58	11	2	2	1	1	119	47	1	1	8.1	96.48	3.04	0.55	1.17	1.16	2.42	16.4	0.595	169	58	60.5	22.2	31	0.9	39.2	41.7	22.3	89.2	28.5	24.6	0	0
1	72	37	1	1	1	1	142	76	1	1	11.7	88.83	5.76	2.67	1.09	3.81	3.38	15.4	5.67	445	72	74.8	27.8	40	0.97	42.3	44.9	23.8	164.8	31.7	26.5	1	0
1	69	10	2	2	1	2	126	78	1	0	5.6	98.18	3.23	1.2	1.45	0.87	3.17	14.4	2.36	175	69	49.5	20.3	27.4	0.86	33.9	35.9	18.8	68.1	26.5	23.3	0	0
0	60	11	2	2	1	2	142	84	1	0	11.7	96.08	3.45	1.62	0.96	1.65	2.97	12.8	6.94	222	60	69.2	25.4	33.4	0.92	43.4	46.1	24.7	116.3	30.9	26.6	1	0
0	55	20	2	2	2	2	104	70	1	1	12.3	122.45	4.29	1.18	0.99	2.44	2.96	14.1	1.31	203	55	56.5	20.8	35	0.86	34.3	36.7	19.2	104.9	26	21.9	0	0
1	67	13	2	2	1	2	170	90	1	1	6.6	61.97	4.81	2.91	0.96	2.51	2.57	12.9	3.53	359	67	64.7	25.9	33.5	0.83	40.5	43	22.7	103.3	29.9	25.7	1	0
0	59	17	2	2	2	2	124	78	1	1	9.9	99.8	4.93	1.04	1.63	2.77	2.63	11.2	3.57	354	59	57.8	24.1	38.3	0.89	33.5	35.6	18.8	121.1	28.8	24	1	0
0	55	14	2	2	1	2	107	86	1	0	10.9	102.02	5.5	0.96	1.46	3.45	2.51	11.28	4.9	276	55	51	22.7	39.8	0.91	28.8	30.7	15.6	127.5	27.6	23	0	0
1	65	17	2	2	1	1	135	80	1	1	7.7	94.52	4.03	3.2	0.9	2.15	2.8	12.2	2.33	340	65	70.1	25.7	32.7	0.87	44.4	47.2	25.5	105.5	30.8	26.4	1	0
1	62	18	2	2	2	2	103	71	1	0	7.3	57.5	4.93	1.64	1.22	2.99	2.74	12.01	1.05	449	62	68.3	27	35.1	0.91	41.7	44.3	23.8	120.5	31.2	26.4	1	0
1	58	3	2	2	1	2	128	82	1	0	7.9	92.82	6.11	2.5	1.13	3.39	2.38	13.1	4.63	316	58	52.3	20.4	29	0.88	35.1	37.2	19.9	66	26.8	23.2	0	0
1	68	15	1	2	1	2	132	76	1	1	6.8	92.55	3.05	2.22	0.84	1.41	3.31	11.1	2.2	207	68	67.2	26.3	39	0.99	38.5	41	22.2	143.9	32.6	27.3	1	0
0	40	1	2	2	2	2	110	72	1	0	7.6	121.25	3.84	1.89	0.96	1.97	2.76	10.59	0.734	308	40	61.7	24.4	32.8	0.88	38.9	41.4	22.2	97.3	29.3	24.9	1	0
0	51	4	2	2	1	2	124	82	0	0	10.7	104.92	3.11	0.71	0.95	1.45	2.91	14.3	1.63	419	51	69.7	27.2	36.6	0.94	41.8	44.2	24.1	127.9	32.7	27.7	1	0
1	56	13	2	2	2	1	104	74	1	0	5.8	115.76	3	1.18	0.9	1.49	2.85	13.5	3.8	251	56	71	27.7	44.7	1	36.8	39.3	20.8	183.4	31.6	25.4	1	0
0	62	2	2	2	2	1	130	80	1	0	6.6	95.86	5.55	0.95	1.4	2.8	2.64	10.3	2.44	293	62	54.5	21.8	31.5	0.89	35.1	37.3	20	79.3	28.1	24.2	0	0
0	57	8	2	2	2	1	152	81	1	0	7.4	96.65	3.24	1.56	1.51	0.6	2.8	12.9	4.86	334	57	53.8	21	38.5	1.02	31.1	33.1	17.4	128.9	27.6	23.1	0	0
0	59	1	2	2	2	1	142	97	0	0	8.1	104.56	5.28	2.87	1.12	2.73	2.81	11.5	4.25	250	59	74	26.2	37.4	0.97	43.7	46.4	25.2	144.4	31.6	26.4	1	0
1	60	1	2	2	2	2	115	72	0	0	7.7	99.73	4.72	3.24	0.91	2.57	2.47	15.5	1.68	394	60	71.9	28.1	41	1	40.1	42.5	23	162.1	34	28.3	1	1
1	55	5	2	2	2	2	133	80	1	0	9.4	102.02	4.66	1.94	1.36	2.31	3.33	13	1.42	231	55	75.4	29.5	39.2	0.96	43.3	45.9	24.9	153.5	33.8	28.1	1	1
1	59	12	2	2	2	1	104	73	1	0	6.5	110.4	3.51	0.92	1.3	1.22	2.94	11.8	2.08	298	59	47.7	19.4	24.1	0.87	34	36.2	19.4	52.1	25.9	22.5	0	0
1	48	8	2	2	2	2	125	82	1	0	6.7	108.5	3.62	1.12	0.99	2.14	2.84	12.5	1.29	214	48	80.7	32.3	41.6	0.99	44.5	47.1	26	170.5	36.8	30.3	1	1
0	68	6	2	2	1	2	117	73	1	0	9.6	90.57	4.3	1.95	1	2.35	2.83	11.6	2.08	442	68	64.1	25.7	36.1	0.9	38.5	41	21.9	119.5	30.7	25.9	1	0
0	66	2	2	2	1	2	148	83	1	0	6.7	98.16	4.42	0.95	1.29	2.1	3.11	13.4	4.02	246	66	65	28.9	43.5	0.97	34.6	36.7	19.8	158.3	33.6	27.2	1	1
0	50	4	2	2	2	1	136	96	1	0	9.9	117.78	6.07	5.2	1.4	3.64	2.96	13.7	2.85	341	50	68.8	28.6	39.2	0.99	39.5	41.8	22.9	143.9	34	28.1	1	1
1	62	5	2	2	1	1	142	80	1	0	7.4	93.32	5.76	1.17	1.55	3.34	2.75	13.26	1.66	375	62	74	29.6	42.2	1	40.2	42.7	23.1	171.4	34.2	28.1	1	1
0	57	10	2	2	2	1	121	60	1	1	8	101.14	4.98	0.89	1.59	2.54	2.82	12.1	1.26	238	57	51	20.4	20.5	0.81	38.2	40.5	21.6	50.9	26	23.2	0	0
0	59	19	2	2	1	1	155	95	1	1	8.3	115.5	4.62	0.72	1.61	2.48	2.27	11.9	1.28	155	59	53.4	22.8	37	0.92	31.6	33.6	17.6	112.7	28.1	23.5	0	0
1	55	1	2	2	1	1	135	97	1	0	5.2	105.3	5.19	2.72	1.1	3.12	2.76	11.4	1.67	413	55	75.9	29.6	42.5	1.03	41.1	43.6	23.7	179.8	33.9	27.6	1	1
1	71	10	2	2	2	2	118	68	1	0	6.1	96.11	4.26	1.54	1.35	2.26	3.02	11.9	2.45	344	71	55.3	23.9	32.4	0.94	35.2	37.4	20	90.3	30.1	25.7	0	0
1	73	9	2	2	1	2	152	89	1	0	6	60.28	4.95	1.76	1.17	2.82	2.63	11.3	6.72	416	73	55.9	22.4	30.9	0.87	36.5	38.6	20.6	79.9	29.1	25.6	0	0
1	67	15	2	2	2	2	117	73	1	1	7.3	96.85	5.22	0.95	1.58	2.54	2.49	13.1	2.28	301	67	57.4	19.6	25.1	0.87	40.5	43	23	69.2	27.2	24.3	0	0
1	41	5	2	2	1	1	161	93	1	0	5.6	117.01	4.51	2.03	0.89	2.71	2.88	12.29	2.09	292	41	67.3	27	35.1	0.88	41.1	43.7	23.8	110.4	32.4	27.3	1	0
1	64	5	2	2	1	2	124	66	1	0	7.5	100.31	4.73	1.52	1.31	2.41	2.91	11.7	1.4	362	64	65.3	24	32.4	1	41.7	44.2	23.8	110.9	30.7	26.7	1	0
0	62	5	2	2	1	2	101	72	1	0	10.2	98.96	2.8	2.14	0.84	1.1	3.08	14.4	0.646	392	62	68.2	26	36	0.97	41.2	43.7	23.8	127	31.7	26.7	1	0
1	44	6	2	2	2	1	138	89	1	0	9.7	121.65	3.87	2.35	1.1	2.18	3.12	12.2	3.62	343	44	70.3	25.2	27.8	0.92	47.8	50.8	28	86.9	31.3	27.2	1	0
1	69	6	2	2	1	1	143	77	1	0	8.6	84.3	3.87	2.23	0.95	1.77	2.54	14	2.93	305	69	81	32.4	42.6	0.98	43.8	46.5	24.4	189.4	34	28.2	1	1
0	59	10	2	2	2	1	146	82	1	1	9.9	101.78	3.01	0.71	0.97	1.45	2.76	11.3	1.95	119	59	52.4	21	26	0.85	36.5	38.8	20.9	58.7	27.6	24.2	0	0
1	81	7	2	2	1	1	159	89	1	0	7.4	83.98	7.15	2.56	1.63	4.18	2.56	85.9	0.92	280	81	64.3	29.4	43.1	0.94	34.5	36.6	19.1	162.4	31.8	25.7	1	1
1	50	11	2	2	1	2	108	75	1	1	9.9	121.16	3.74	2.29	0.05	1.29	1.65	9.97	0.87	426	50	62.4	23.8	33.1	0.92	39.2	41.7	22.5	101.5	29.4	25	0	0
1	63	10	2	2	1	2	137	82	1	0	8	93.02	3.54	1.2	1.68	0.93	2.85	12.7	5.37	379	63	63.5	24.5	29.8	0.85	41.9	44.6	24.3	76.9	30	25.7	1	0
0	63	9	2	2	1	2	139	93	1	0	7	85.92	5.32	2.22	1.01	3.23	2.86	15	1.59	259	63	63.2	25.3	37.3	0.96	37.3	39.6	21.1	131.2	30.1	25.3	1	0
1	73	14	2	2	1	1	140	75	1	0	11.8	90.45	5.01	2.03	1.37	2.76	2.53	12	4.58	218	73	61.7	26	34.9	0.89	38	40.2	21.3	111.8	30.4	25.9	1	0
1	60	13	2	2	1	1	108	72	1	0	10.8	106.98	4.56	4.03	0.98	2.55	3.05	13.5	4.37	235	60	56.8	24.3	36.8	0.87	33.8	35.9	18.9	111.2	29.3	24.7	1	0
0	52	12	2	2	2	1	116	77	1	1	8.5	102.35	5.48	1.18	1.31	3.47	2.55	10	2.72	258	52	71.3	27.9	38.8	0.95	41	43.6	23.8	142.8	32.4	26.7	1	0
1	33	8	2	2	2	2	102	63	1	1	9.4	128.33	3.28	0.52	1.17	1.4	2.91	12.4	2.39	195	33	54.3	20.4	22.4	0.79	39.5	42.1	22.5	55.3	26.2	23.2	0	0
1	44	1	2	2	2	1	108	78	0	0	12.1	117.2	6.19	2.57	1.3	4.45	2.78	14.2	0.837	188	44	64.5	25.2	37.1	0.93	38.2	40.6	21.9	124.9	31.2	26.2	1	0
1	59	3	2	2	2	1	137	86	1	0	11.4	105.32	5.62	2.57	1.25	3.26	2.84	12.3	4.88	282	59	81.1	32.9	43.6	1.06	43.3	45.8	25.4	188	37.9	30.6	1	1
0	48	1	2	2	1	1	128	76	1	0	8.2	118.28	4.85	2.76	0.87	3.13	2.84	13.2	2.25	258	48	50.5	21.3	31	0.92	32.9	34.8	18.6	73.7	28.5	24.9	0	0
0	47	7	2	2	2	1	110	80	1	0	6.4	108.58	5.21	1.96	1.18	3.17	2.7	12.2	3.71	473	47	54.8	22.8	32.4	0.87	34.8	37	19.9	80.9	28.3	23.9	0	0
0	63	11	2	2	1	2	146	81	1	1	10.8	116.18	4.67	1.22	0.93	3.01	2.58	13.1	1.03	314	63	61.6	25.3	36.7	0.97	36.7	39	20.8	126.7	31.2	26.4	1	0
1	59	1	2	2	2	2	114	89	1	0	11.5	105.32	5.01	0.91	1.22	2.92	2.84	16.1	0.971	198	59	59.2	23.7	34.7	0.93	36.4	38.7	20.4	112.3	29.2	24.9	0	0
0	66	9	2	2	2	2	145	72	1	0	8.4	90.72	7.81	0.99	1.65	4.4	2.74	12.4	5.37	294	66	56.2	24	36.5	0.9	33.5	35.7	18.6	117.2	28.2	23.6	1	0
0	54	10	2	2	1	1	125	83	1	1	8.2	109.09	4.56	2.74	1.14	1.87	2.34	12.5	6.37	190	54	58.7	22.9	29.4	0.9	39.1	41.5	22.6	73.6	29.9	26	0	0
1	54	17	2	2	1	1	119	70	1	1	8	77.17	3.93	1.32	1.26	1.77	3.4	13.25	3.13	460	54	57.6	23.1	32.4	0.88	36.7	38.9	20.6	94.7	27.9	24	0	0
1	72	8	2	2	2	2	120	71	1	0	7.5	96.13	2.87	0.9	0.92	1.16	2.86	13.4	1.21	226	72	55.3	22.4	33.7	0.91	34.3	36.7	19	104.9	27.9	23.9	0	0
1	69	24	2	2	2	2	117	76	1	1	6.3	89.81	4.27	1.11	1.27	2.17	2.57	10.2	3.23	273	69	58.5	22.3	31	0.91	38	40.4	21.5	89.3	27.7	23.7	0	0
0	67	20	2	2	2	2	137	66	1	1	7.5	101.85	3.16	0.61	1.14	1.28	2.62	12.9	1.97	147	67	50	19.5	28.5	0.84	33.7	35.8	18.7	67.6	24.9	21.6	0	0
0	67	12	2	2	1	2	133	68	1	1	5.8	97.5	3.63	1.37	1.18	1.46	2.81	11.06	4.96	242	67	55	22.9	32.2	0.83	35.2	37.3	19.8	81.3	27.9	23.9	0	0
0	66	20	2	2	2	1	138	79	0	1	6	77.26	5.46	1.51	1.29	3.1	2.65	12.5	0.709	202	66	57.2	23.8	31.4	0.88	37.1	39.3	21.1	83	29.4	25.3	0	0
1	52	12	2	2	2	1	150	90	1	1	9.1	119.32	5.02	2	1.1	2.98	2.59	10.7	2.65	274	52	57.9	24.4	31.2	0.92	37.6	39.8	21.5	85.1	30.8	26.8	1	0
0	57	6	2	2	2	1	115	72	0	0	7.8	106.33	4.76	1.14	1.23	2.26	3.06	13.4	1.56	275	57	64.1	26.3	37.1	0.91	37.9	40.3	22	116.5	31.8	26.4	1	0
0	53	12	2	2	2	2	119	82	0	0	14.7	117.16	6.27	1.84	1.24	3.91	2.96	13.9	1.17	392	53	58.3	22.8	25	0.84	41.3	43.7	23.7	64.9	28.6	25.3	0	0
1	67	13	2	2	2	1	141	71	0	1	8.8	92.12	5.31	2.44	1.16	3.17	2.64	12.6	0.639	357	67	66.2	29.4	48.6	0.94	32.1	34	17.7	187.5	32.9	26.4	1	1
0	52	9	2	2	1	2	131	78	1	0	8	112.3	5.52	1.87	1.31	3.33	2.7	12.1	0.721	308	52	61.1	22.7	28.8	0.95	40.9	43.5	23.5	85.5	29.1	25.2	0	0
1	50	13	2	2	2	1	134	92	1	0	7.3	129.64	4.63	1.63	1.23	2.73	3.06	12.5	2.68	245	50	71.8	28.8	39.7	1	40.8	43.3	23.3	158	33	27.2	1	1
0	67	13	2	2	2	2	120	76	1	1	8	94.35	4.66	1.12	1.2	2.57	2.88	11.7	2.06	353	67	62.4	23.8	34.3	0.95	38.6	41	21.8	115.5	28.7	24.2	0	0
0	74	6	2	2	1	2	147	74	0	0	6.4	79.53	2.94	0.86	0.98	1.09	2.84	13.6	3.4	279	74	55.2	24.9	35.1	0.81	33.8	35.8	18.6	99.9	27.8	23.4	1	0
1	58	6	2	2	1	1	180	100	1	0	10.4	110.4	5.45	2.31	1.34	3.15	2.83	12.4	2.54	343	58	81.4	32.6	48.9	1.05	39.3	41.6	22.4	218.6	36.3	28.9	1	1
1	38	5	2	2	2	1	126	86	0	0	12.3	135.17	3.36	1.35	0.97	1.77	2.5	14.7	1.59	239	38	109.7	39.8	51.8	1.03	49.6	52.8	29.4	253.7	42.6	32.5	1	1
0	51	1	2	2	2	1	120	83	0	1	5.8	110.6	3.82	0.93	1.33	1.71	2.97	12.19	1.27	243	51	64.3	22.8	25.9	0.89	44.9	47.6	26.1	75.9	29.2	25.7	0	0
1	40	1	2	2	2	2	127	93	0	1	11.3	120.36	5.82	1.33	1.33	3.5	2.63	12.1	1.09	315	40	60	24.3	28.5	0.82	40.4	42.9	23.2	69.4	29.4	25.3	1	0
0	65	9	2	2	2	1	115	75	0	1	7.6	85.69	4.62	0.86	1.68	1.74	2.81	11.7	2.98	213	65	51.7	21.8	27.3	0.83	35.5	37.6	20.1	60.8	27.6	24.1	0	0
0	55	18	2	2	1	1	128	72	1	1	7.8	114.72	6.76	2.96	1.51	3.58	2.85	14.2	1.14	292	55	63.8	26.6	33.8	0.92	39.8	42.2	22.8	107.2	32	27.4	1	0
1	63	8	2	2	1	2	141	83	0	0	8.5	102.38	4.32	2.28	1	2.32	2.75	13.2	1.81	439	63	65.7	23	32.2	0.97	42	44.6	23.9	109.8	29.1	25	0	0
1	68	20	2	2	1	2	126	78	1	0	9.2	96.14	5.38	3.48	1.18	2.33	3.1	13.8	1.69	278	68	50.4	22.4	33.5	0.86	31.6	33.5	17.6	84.8	26.7	22.4	0	0
1	65	3	2	2	1	1	150	93	0	0	6.6	73.77	3.54	1.39	1.08	1.84	3.08	9.61	3.14	458	65	67	26.5	40.4	0.99	37.7	39.9	21.4	152.5	32.4	27.3	1	0
0	68	2	2	2	2	2	143	86	0	0	6.2	98.16	5.51	1.19	1.23	3.29	2.61	10.6	3.3	244	68	64.1	23.8	29.5	0.9	42.7	45.2	24.4	86	30.1	26.4	0	0
0	32	5	2	2	2	1	103	77	0	0	11.1	131.42	4.62	1.9	1.06	2.95	2.97	12.9	1.89	329	32	60.3	22.4	30.2	0.82	39.5	42.1	22.4	77.2	26.9	22.9	0	0
0	28	1	2	2	2	1	126	94	0	0	8.6	130.03	5.37	2.66	1	3.5	3.05	12.8	1.61	450	28	62.5	25.7	39.4	0.91	35.6	37.9	20.4	128.2	30.5	25	1	0
0	29	1	2	2	2	1	139	97	0	0	12.5	141.59	5.21	1.05	1.07	3.46	2.4	10.4	6.25	296	29	61.2	25.5	36.4	0.87	36.7	38.9	20.9	110	30.3	25.5	1	0
0	27	1	2	2	2	2	121	92	0	0	8.6	120.09	4.42	1.66	1.08	2.62	2.8	15.3	1.57	275.8	27	58.8	23.9	37.5	0.89	34.6	36.8	19.7	112.2	29.2	24.3	0	0
0	39	3	2	2	2	1	117	76	0	0	6.2	120.36	3.49	1.89	0.75	1.77	3.04	12.5	2.36	253	39	69.7	24.1	34.1	0.88	43.2	45.9	24.8	112.1	29.9	25.6	1	0
1	65	8	2	2	2	1	129	81	0	0	5.9	94.52	4.57	0.89	1.19	2.94	2.79	12.9	1.83	297	65	52.1	21.7	30.6	0.85	33.9	36.1	19.3	68	27.3	23.3	0	0
1	54	2	2	2	2	2	116	81	0	0	10.1	114.34	6.02	2.25	1.12	3.96	2.64	12.2	3.07	289	54	57.9	27.5	43	0.98	31.2	33	17.5	149.9	33.3	27.5	1	0
0	35	1	2	2	2	2	120	70	0	0	12.1	120.37	5.2	2.02	1.09	2.97	3.31	14	2.31	311	35	71.6	29.8	41.9	0.95	39.2	41.6	22.7	156.2	34.6	28.3	1	1
0	57	1	2	2	2	1	129	76	0	0	11.4	105.29	8.27	1.98	1.72	5.32	2.06	9.56	4.68	245	57	51	18.7	25.3	0.84	35.8	38.1	20.5	53.9	25.9	22.6	0	0
1	66	1	2	2	2	1	140	80	0	0	13.1	101.01	5.05	1.18	1.58	2.38	2.49	12.2	1.36	329	66	48.4	22.1	46.1	1.08	24.4	26.1	12.7	177.1	27.7	22.9	0	0
1	43	1	2	2	1	2	124	94	0	0	10.4	122.51	4.1	3.3	0.81	1.86	2.71	14.1	1.69	172	43	67.8	28.2	41.5	0.93	37.4	39.7	21.6	145.1	32.7	26.4	1	1
1	46	1	2	2	2	2	130	84	0	0	9.3	119.95	5.96	1.75	1.38	3.09	2.73	13.6	1.83	163	46	67.4	27	41.6	0.9	36.8	39.3	21.2	144.8	31.8	26	1	0
1	55	1	2	2	2	2	160	90	0	0	13.3	108.36	4.26	1.11	0.82	2.72	2.98	10.7	1.39	217	55	59	22.5	27.1	0.89	40.5	43	23	78	28.9	25.5	0	0
1	50	1	2	2	2	1	194	115	0	0	11.4	109.09	6.24	6.85	1.25	2.84	2.82	12.06	0.75	373	50	81.2	32.9	44.2	0.9	42.8	45.3	23.9	182.1	33.1	26.7	1	1
1	82	20	2	2	1	1	143	60	0	1	7.9	70.25	5.37	2.92	1.31	2.85	2.65	14.5	1.71	245	82	52.7	23.4	34.2	0.85	32.7	34.7	18.2	92.4	28.1	23.7	0	0
1	62	17	2	2	1	1	118	74	0	1	7.7	106.33	3.97	1.03	1.69	1.46	3.5	15.8	7.48	162	62	50.9	19.9	27.7	0.86	34.6	36.8	19.3	69.2	25.6	22.2	0	0
1	72	10	2	2	2	1	150	100	1	1	6.5	94.13	2.81	0.64	1.21	0.82	3.01	11.6	4.14	320	72	70.5	29.7	43.9	0.98	37.3	39.6	20.9	177.5	33.6	27.4	1	1
0	65	14	2	2	1	2	110	60	0	1	7.5	92.89	4.52	0.74	1.16	2.52	3.04	12.3	1.81	169	65	60.7	24.6	34.3	0.92	37.6	39.9	21.4	107.2	29.9	25.2	1	0
1	61	10	2	2	1	1	170	87	0	1	8.5	11.96	4.89	3.67	1.07	1.7	2.63	11.2	1.47	469.4	61	69.5	27.1	34.3	0.8	43.2	45.7	23.9	113.3	28.4	24.5	1	0
0	63	11	2	2	1	1	117	60	1	1	6.1	104.75	5.34	1.13	1.26	3.05	3.05	13.1	1.02	305	63	44.3	20.5	29.6	0.86	29.6	31.2	16.6	53.2	27.6	24.1	0	0
1	60	12	2	2	2	1	105	64	1	1	7.9	105.36	6.91	2.44	1.11	4.41	2.34	10.01	2.5	265	60	70.6	27.6	34.2	0.92	43.7	46.5	25.1	119.3	31.8	26.8	1	0
1	47	20	2	2	2	1	123	89	1	1	7	107.91	5.22	2.19	1.2	2.59	2.93	12.7	1	261	47	55.4	20.3	23	0.83	40.2	42.7	23.2	54.3	27.1	23.9	0	0
1	63	12	2	2	2	2	140	83	1	1	7.2	115.76	5.99	1.41	1.32	3.5	3.22	14.6	1.06	267	63	66.9	25.5	34.8	0.95	40.9	43.6	23.6	119.1	30.5	25.6	1	0
1	69	13	2	2	2	1	142	85	0	1	10.5	90.01	3.03	0.88	0.92	1.41	3.27	12.3	3.41	349.5	69	59.7	22.5	33.7	0.9	37.2	39.6	21.1	102.1	28.8	24.8	0	0
0	57	26	2	2	1	2	146	78	0	1	7	18.78	3.7	1.7	0.98	1.23	2.98	11.7	2.58	165	57	59.8	24.9	31.3	0.77	38.9	41.1	21.5	82.9	28.5	25	1	0
1	69	15	2	2	1	2	145	63	0	1	9.5	94.83	2.59	1.17	0.94	0.87	3.15	14.6	1.12	264	69	58.8	25.1	37	0.9	34.9	37	19.5	118.9	29.9	25.3	1	0
1	68	15	2	2	2	1	150	86	0	1	6.9	99.6	5.79	1.07	1.52	3.33	2.67	13	4.12	286	68	66.8	26.4	35.4	0.95	40.6	43.1	23.3	122.1	32.1	27.4	1	0
0	58	17	2	2	2	2	130	81	0	1	7.8	105.3	4.22	1.92	1.18	2.29	3.15	12.5	2.71	299	58	53.6	23.8	35.6	0.88	32.5	34.5	18.3	99	29.1	24.5	0	0
1	71	22	2	2	2	2	140	86	1	1	9.9	105.89	4.42	2.62	0.97	2.37	2.64	13.4	1.63	227	71	60.1	26.7	39.6	0.94	34.2	36.3	19	139.1	31.2	26	1	0
1	52	18	2	2	1	1	143	73	0	1	11	43.85	6.18	3.52	1.37	3.08	2.42	12.3	3.3	325	52	60.6	24	30.5	0.92	39.6	42.1	22.7	87.3	30.2	26.2	1	0
0	34	6	2	2	2	1	118	81	0	1	9	134.6	3.06	1.91	0.92	1.39	2.67	9.93	1.59	133	34	80.8	30.8	37.7	0.91	47.4	50.4	27.4	146.3	33.6	27.8	1	1
0	37	1	2	2	2	1	122	85	0	1	9.5	111.22	5.32	1.64	1.24	3.31	3.17	13.4	0.759	349	37	54.8	21.4	25.6	0.81	38.4	40.7	22.2	54.7	27.2	23.7	0	0
0	46	1	2	2	2	2	145	92	1	1	10.5	121.81	5.59	2.07	1.35	3.59	2.58	12.6	2.31	337	46	65.8	26.4	30.9	0.89	43	45.5	24.6	93.1	31.3	27.2	1	0
0	40	5	2	2	2	2	117	69	1	1	7.5	112.79	4.52	2.02	1.03	2.49	2.64	11.7	1.37	362	40	86.5	31	38.1	0.97	50.3	53.5	29.2	164.6	34.3	28.2	1	1
0	54	7	2	2	2	1	114	76	1	1	10.6	99.23	3.7	1.21	1.31	1.49	2.73	10.5	0.91	271	54	63.4	24.8	29.8	0.94	42	44.5	24.4	84.8	31.6	27.4	1	0
0	66	1	2	2	1	2	150	90	0	0	12.8	103.39	6	1.47	1.56	3.07	3.05	11	1.74	633	66	69.5	26.8	34.8	0.94	42.6	45.3	24.1	128.8	31.5	27	1	0
1	33	1	2	2	2	2	120	98	0	0	11	123.76	4.67	1.03	1.13	2.77	3.01	13.8	1.27	227	33	94.9	37.1	50.8	1.04	43.9	46.7	25.5	240.5	40	31.1	1	1
1	77	25	2	2	1	2	138	76	0	1	11.2	85.5	6.6	1.81	1.56	3.75	2.34	15	0.78	316	77	94.9	37.1	50.8	1.04	43.9	46.7	25.5	240.5	40	31.1	1	1
1	26	2	2	2	2	1	110	75	0	1	8.1	130.01	4.93	1.65	1.11	2.78	2.9	14.5	2.29	386	26	58.7	24.1	35.9	0.9	35.4	37.6	20.4	103	30.4	25.5	1	0
0	58	2	2	2	2	2	146	88	0	1	8.1	104.56	3.9	0.79	0.95	2.07	2.91	12.29	1.65	243	58	60.2	23.8	32.8	0.92	38.1	40.5	21.6	100.8	30.1	25.9	0	0
1	75	3	2	2	2	1	119	66	0	1	10	91.52	3.62	0.49	1.72	1.15	2.17	10.2	3.17	235	75	58.9	24.5	37	0.92	34.9	37.1	19.5	121.4	29.4	24.7	1	0
1	71	26	2	2	1	2	154	82	1	1	6.4	88.39	4.63	1.74	1.03	2.72	2.72	10.03	4.3	341.6	71	80.6	30.3	43.3	1.01	42.9	45.7	24.1	196.5	33.1	27.1	1	1
0	53	17	2	2	2	1	123	71	1	1	6.3	84.64	2.14	0.85	1.13	0.6	3.03	12.6	0.103	231	53	65.2	25.2	34	0.89	40.4	43	22.9	112.1	30.2	25.9	1	0
0	51	7	2	2	1	1	145	90	0	1	9.4	103.56	5.9	2.14	1.12	3.41	2.6	12.2	1.9	300	51	73	26.8	36.5	0.97	43.6	46.3	25	140.1	32.2	27.4	1	0
0	54	12	2	2	2	2	90	60	1	1	6.2	114.52	3.12	0.89	1.47	0.85	2.93	12.3	1.36	268	54	42.5	18.2	25.9	0.78	29.6	31.5	16.5	45.5	23.4	20.1	0	0
0	71	1	2	2	1	2	160	100	0	1	5.9	96.81	3.74	0.82	1.39	1.37	1.29	86.9	2.9	223	71	54.2	20.7	27.4	0.9	37.1	39.4	21.1	69.5	27.3	23.7	0	0
0	69	19	2	2	2	1	150	78	1	1	8.4	90.31	2.97	1.53	0.94	1.41	2.58	11.3	2.03	256	69	55.1	23.8	35.6	0.85	33.4	35.5	18.8	99	29.2	24.7	0	0
0	62	13	2	2	2	1	136	80	1	1	7	94.33	5.11	1.35	1.19	2.88	2.73	11.9	1.24	344	62	61	24.4	29.6	0.86	40.4	42.9	23.4	73.8	30.3	26.2	1	0
0	61	12	2	2	1	1	150	100	1	1	7.3	115.01	3.98	1.6	0.99	2.53	3.36	13.9	0.123	194	61	64.8	25.3	39.8	0.97	36.6	39	20.8	147	30.8	25.6	1	0
1	59	11	2	2	1	1	117	82	0	1	6.7	103.82	2.79	0.93	0.8	1.39	3.64	15.4	2.02	229	59	59.7	22.5	29	0.88	40	42.4	22.9	76.9	28.3	24.6	0	0
1	65	8	2	2	2	2	125	70	0	1	6	101.72	4.14	1.3	0.97	2.52	2.91	12	2.57	245	65	73.3	29.4	42	0.96	39.9	42.5	22.6	168.9	33.6	27.8	1	1
0	59	10	2	2	1	1	119	70	0	1	9	104.56	4.78	0.93	1.46	2.64	2.75	11.7	5.03	239	59	52	21.6	32.2	0.87	33.2	35.3	18.6	82.2	26.8	22.8	0	0
1	59	18	2	2	2	1	121	79	1	1	8.8	104.56	3.41	1.67	0.95	1.35	2.75	12.8	2.07	343	59	63.2	24.7	35.9	0.95	38	40.5	21.9	119.1	30.5	25.5	1	0
1	70	15	2	2	2	2	140	70	1	1	9.4	96.79	4.39	1.12	0.94	2.54	2.88	13.9	2.11	315	70	61.4	25.2	35.5	0.94	37.2	39.6	21	118.9	30	25.2	1	0
0	67	6	2	2	1	1	126	78	1	1	5.8	92.76	3.16	0.88	0.73	1.71	2.71	13.7	4.08	410	67	64	25	36.9	0.9	38.1	40.4	21.5	124.3	30.5	26	1	0
1	62	8	2	2	2	1	120	70	1	1	7	102.38	3.1	1.05	1.17	1.13	2.57	13.1	1.09	303	62	65	24.8	33.6	0.92	40.8	43.2	23.2	110.2	30	25.8	1	0
0	48	10	2	2	2	2	112	78	0	1	10.6	113.76	5.58	0.97	1	3.75	3.35	13.7	2.19	189	48	54.7	20.1	28.6	0.9	36.8	39.1	21	70.2	27.2	23.6	0	0
1	68	28	1	2	1	2	120	70	0	0	6.1	89.94	5.09	1.96	1.17	2.69	2.46	12.3	3.31	300	68	56.1	23.1	33.2	0.85	35.3	37.5	19.8	91.3	27.5	23.3	0	0
1	65	8	2	2	1	2	156	89	0	0	7.3	103.22	2.79	1.19	0.83	0.99	2.07	13.8	1.28	149	65	69.2	27.7	43.5	0.99	36.8	39.1	20.6	176.1	32.3	26.5	1	0
0	72	13	2	2	2	2	132	65	1	1	9.5	81.58	3.89	1.65	1.34	1.48	2.53	11.6	1.57	154	72	69.2	27.7	43.5	0.99	36.8	39.1	20.6	176.1	32.3	26.5	1	0
0	47	1	2	2	2	2	108	76	0	0	12	128.18	4.88	1.84	0.73	3.36	2.64	12.7	6.25	310	47	41.5	18	26.2	0.79	28.9	30.6	15.6	56	22.7	19.9	0	0
0	52	4	2	2	2	1	131	79	0	0	8.6	116.96	4.39	3	1.25	2.01	2.69	11.4	2.78	303	52	71.5	25.3	34.8	0.93	43.8	46.6	25.3	122.9	30.6	25.9	1	0
1	68	20	2	2	2	1	150	90	1	1	8.8	96.79	6.26	2.88	1.34	4.22	3.18	12.6	1.67	210	68	67.8	26.8	37.9	0.94	39.6	42.1	22.6	137.8	31.1	25.7	1	0
0	69	13	2	2	1	2	131	70	1	1	6	38.54	2.77	1.02	1.18	0.94	2.73	12.56	4.71	528	69	77.3	31	48.4	0.91	37.6	39.9	20.7	198.2	32.1	25.7	1	1
0	56	7	2	2	2	2	131	98	1	0	12	102.57	7.02	4.47	1.59	3.31	2.65	11.06	4.65	263	56	52.4	22.7	28.1	0.86	35.4	37.7	19.8	72.4	28.1	24.5	0	0
0	48	13	2	2	2	1	126	85	1	0	7.9	127.72	6.29	2.33	1.32	4.13	2.67	9.73	2.24	265	48	61.7	23.2	32.7	0.93	39	41.5	22.4	99.4	29.7	25.4	0	0
0	70	3	2	2	2	1	140	85	1	1	8.3	63.88	2.72	1.62	0.83	1.26	2.65	10.8	4.02	303.4	70	71	29.9	41.4	0.87	39.2	41.6	22.2	147	32.1	26.1	1	1
0	45	1	2	2	2	1	108	74	0	0	11.2	120.8	4.35	1.8	0.89	2.67	2.38	10.2	1.06	253	45	59.7	26.2	31.8	0.87	38.4	40.7	22.2	81.5	31.8	27.1	1	0
1	61	2	2	2	2	1	131	79	0	1	6.6	95	1.19	0.88	3.7	1.02	2.97	10.59	2.91	404	61	71.4	27.2	37.6	0.98	41.9	44.5	24.3	140.3	33.2	27.9	1	0
0	30	1	2	2	2	1	130	80	0	0	11.3	147.54	4.5	1.2	0.99	2.99	2.79	14.1	1.86	348	30	72.5	27.8	48.2	0.97	35.3	37.6	19.8	198	31.2	24.8	1	0
1	99	0.33	2	2	1	2	138	88	0	0	8.1	73.07	4.62	2.3	0.99	2.49	3.25	20.9	2.51	194.1	99	60	28.1	46.8	0.99	30	31.9	16.2	184	31.6	25.7	1	1
1	70	15	2	2	2	1	140	80	1	0	7.1	91.81	6.3	1.42	1.44	4.16	2.36	14.1	1.07	324	70	61.3	26.2	36.8	0.9	36.5	38.8	20.7	118.4	30.7	25.6	1	0
1	48	13	2	2	2	1	106	78	1	1	10.2	121.35	4.21	0.75	1.09	2.53	3.11	11.3	0.88	170	48	61.6	22.9	34.1	0.97	38.3	40.6	21.8	111.1	29.6	25.3	0	0
1	78	24	2	2	2	2	142	77	0	1	8.6	87.88	3.91	0.76	0.96	2.28	2.64	9.95	4.2	327	78	57.7	23.4	26.9	0.83	39.6	42.2	22.3	73.3	28.2	24.6	0	0
1	61	15	2	2	2	1	140	82	1	0	8.3	95.41	5.21	1.19	1.27	3.42	2.81	14.2	1.18	367	61	57.7	23.4	26.9	0.83	39.6	42.2	22.3	73.3	28.2	24.6	0	0
0	60	10	1	2	2	2	143	85	1	1	11.2	107.84	4.47	2.53	1.02	2.71	2.86	12.3	0.94	276	60	61.1	23.9	29	0.89	40.9	43.4	23.2	83.4	29.2	25.3	0	0
1	61	10	2	2	2	1	130	70	1	0	8.8	97.22	2.55	1.26	0.88	0.92	3.05	12.13	1.24	284	61	54.1	21.1	24.2	0.85	38.7	41	22	61.5	27.3	24.3	0	0
1	78	19	2	2	1	2	135	68	0	0	7.8	81.23	5.65	2.05	1.13	3.35	2.59	12.8	4.08	274	78	54.5	24.2	38.6	0.91	31.5	33.5	17.5	121.3	29.4	24.6	1	0
0	62	10	2	2	2	2	120	70	0	0	5.3	101.66	5.02	1.74	1.19	2.92	2.7	11.8	4.35	361	62	73	31.2	44.5	0.96	38.1	40.5	21.9	173.4	34.9	27.9	1	1
1	24	0.08	2	2	2	2	117	71	0	0	6.4	133.71	5.32	3.57	0.84	3.35	3.09	10.9	4.48	420	24	82.1	28.7	39.8	1.01	46.4	49.4	27.2	167.8	33.9	27.9	1	1
1	59	5	2	2	1	2	142	96	1	0	9.8	101.78	4.67	2.45	1.36	3.1	3.07	13.7	1.24	348	59	85.1	33.2	47.7	1.02	41.9	44.5	24.1	214	37.7	30.3	1	1
1	72	8	2	2	2	1	147	78	0	0	7.6	84.72	4.94	1.6	0.98	2.91	2.87	11.4	1.18	313	72	78.7	30.7	41.8	1	43.2	45.8	24.7	177.5	33.7	27.4	1	1
0	49	18	2	2	2	1	154	89	1	1	8.7	104.53	5.85	1.87	1.08	3.94	2.78	12	0.91	271	49	69.4	26.4	26.3	0.87	48.1	51.1	28.4	76.4	32.1	27.9	1	0
0	28	7	2	2	2	2	110	80	0	1	8.8	151.31	4.76	4.99	0.87	2.84	3.12	12	1.4	241	28	53.9	21.1	35.3	0.95	32.8	34.9	18.5	105	28.5	24.5	0	0
0	59	10	2	2	2	1	127	71	0	1	11	108.5	3.7	0.73	1.07	2.07	2.92	14.1	1.14	218	59	63.3	26.3	32.8	0.84	40	42.5	22.6	98.1	30.2	25.9	1	0
0	50	3	2	2	2	1	168	105	1	0	9.9	131.15	4.04	1.05	1.09	2.46	2.72	14	1.96	187	50	67.6	26.7	36.8	0.91	40.1	42.7	22.7	130	31	25.9	1	0
1	53	11	2	2	2	1	124	75	1	1	9.2	101.63	5.52	1.19	1.24	3.41	2.89	13.8	2.81	274	53	60.8	24.4	35.2	0.87	37.1	39.4	21.1	103.6	28.8	24	1	0
0	67	13	2	2	2	2	132	72	0	1	7.2	100.27	5.05	1.62	1.18	2.97	2.74	11.4	3.65	245	67	56	23.6	35.4	0.92	34.3	36.2	19.4	103.8	29.9	25.6	0	0
1	75	6	2	2	1	2	151	70	0	1	6.5	90.86	5.15	1.7	1.41	3.04	2.97	12.5	1.13	369	75	63.2	24.7	36.4	0.89	37.9	40.2	21.4	118.6	29.8	25.3	1	0
1	39	1	2	2	2	1	111	73	0	0	9.4	130.44	4.31	4.79	0.94	2.1	2.83	12.6	0.86	173	39	59.5	25.1	37.6	0.93	34.9	37.1	20	118.9	31.1	26	1	0
0	55	14	2	2	2	2	140	88	0	1	8.5	108.32	4.99	1.44	1.21	3.34	2.74	11.8	3.6	255	55	60.1	26.7	40.9	0.89	33.5	35.5	18.9	132.7	31.7	26.3	1	0
1	58	15	2	2	1	2	144	74	0	1	8.7	108.5	4.47	1.57	1.08	2.6	2.58	10.59	7.48	300	58	68.1	31.1	43.6	0.91	36.2	38.4	20.6	157.3	34.1	27.4	1	1
0	55	4	2	2	2	2	153	90	1	0	8	111.69	5.2	3.55	1.09	2.84	3.06	11	1.51	232	55	53	22.9	29	0.84	35.5	37.6	20.5	58.8	28.8	24.8	0	0
1	71	1	2	2	2	1	133	80	0	0	5.8	95.43	4.04	1.62	1.15	2.39	3.03	11.09	6.27	272	71	50.6	20.3	30.3	0.91	33.1	35.3	18.6	73.9	26.5	22.8	0	0
0	32	1	2	2	2	1	130	80	0	0	5.9	122.18	4.31	1.36	1	2.53	3.51	13.9	1.73	323	32	68.1	26.9	33.7	0.93	42.7	45.2	24.8	107.9	32.7	27.9	1	0
1	56	11	2	2	2	1	125	80	0	0	8.2	109.18	5.3	1.5	1.26	3.27	2.54	11.1	2.39	367	56	57.2	23.8	29.6	0.81	37.9	40.3	21.6	68.4	28.7	24.7	0	0
1	73	2	2	2	2	2	146	80	0	0	6.8	66.47	3.73	1.68	1.27	1.79	3.28	13.1	1.51	522	73	88.2	32	42.7	1.06	47.8	50.6	27.8	198.6	37.3	30.8	1	1
1	58	1	2	2	2	1	123	75	0	0	8.1	99.89	6.71	1.98	1.12	4.9	2.81	12.6	0.85	415	58	72.5	26.6	37.8	0.99	42.4	45.1	24.5	146.6	31.9	26.6	1	0
1	66	20	2	2	2	2	125	85	1	0	8.9	115.86	4.59	0.83	1.19	2.65	2.14	12.8	3.25	216	66	53.6	22	30.7	0.89	34.9	37.1	19.5	82.1	27.8	24.1	0	0
0	58	19	2	2	2	2	150	75	1	1	7.2	117.46	4.76	1.72	0.99	3.04	2.88	14.8	0.894	192	58	47.6	20.3	22.8	0.86	34.6	36.8	19.4	56.2	25.9	22.7	0	0
1	57	1	2	2	1	2	121	83	0	0	10.4	106.81	5.11	2.09	1.07	3.26	2.96	13.9	1.47	259	57	68.7	26.8	41.7	0.97	37.8	40.1	21.6	156.9	31.9	26.3	1	0
1	52	2	2	2	2	2	140	90	1	0	6.7	114.07	4.8	0.82	1.31	2.76	2.74	13.6	3	171	52	61.5	22.9	28.4	0.84	41.4	44	23.7	76.1	28.6	25	0	0
0	57	4	2	2	1	1	127	82	0	1	5.7	106.04	6.48	1.06	1.68	3.94	1.52	94.8	2.1	212	57	69.3	24.6	34.4	0.95	42.8	45.5	24.9	116.5	30.6	25.6	1	0
1	78	1	2	2	1	2	158	90	1	0	6.4	81.23	4.63	6.83	1.09	1.08	2.84	10.9	6.19	506	78	78.4	29.9	41.2	1.12	43.4	46.1	24.6	193.8	34.6	28.6	1	1
0	54	20	2	2	2	1	152	76	0	1	8.4	29.73	4.01	1.78	0.81	2.22	2.84	12.4	2.5	392	54	75.9	28.6	38.8	0.98	43.8	46.4	24.4	166.3	32.4	27.5	1	1
0	32	4	2	2	2	1	118	77	0	0	10	139.62	4.56	2.55	1.16	2.63	2.79	11.6	1.63	316	32	76.1	29.7	41.1	0.92	42	44.8	24.2	158.8	32.2	25.9	1	1
1	77	25	2	2	2	1	121	71	1	0	6.5	64.53	4.01	2.38	0.87	2.31	2.63	12.7	0.9	464.1	77	68	26.6	37.6	0.91	39.9	42.4	22.5	136.7	32	27.3	1	0
1	57	10	2	2	2	2	170	100	1	1	12.5	20.9	5.84	4.07	1.05	3.45	2.69	12.7	3.46	357	57	88.3	31.7	40.4	1.04	49.5	52.7	28.6	189.6	35.2	28.8	1	1
1	57	7	2	2	2	1	120	65	1	1	6.9	117.13	3.33	1.22	1	1.81	2.59	11.01	6.19	328	57	63.9	23.8	31.6	0.91	41	43.7	23.4	98.3	29.1	24.8	0	0
1	74	30	1	2	1	2	150	120	1	0	10.9	74.59	3.73	2.06	1.03	1.88	2.9	15.1	3.17	617	74	73.8	29.6	45.3	1.03	38	40.4	21.4	194.7	33.4	27.1	1	1
1	66	20	2	2	2	2	135	80	1	0	5.9	22.96	5.99	1.37	1.11	3.83	2.64	13.1	4.37	295	66	62.2	22.8	35.9	0.9	37.6	39.9	20.9	121.9	28.8	24.7	0	0
1	72	8	2	2	1	1	153	84	0	0	10.9	96.13	3.39	1.66	0.74	1.9	2.78	11.7	3.1	209	72	58.3	24.9	38	0.93	33.9	36.1	18.7	132.7	28.9	24.1	1	0
0	62	9	2	2	2	2	131	69	0	1	7.1	104.68	6.14	1.47	1.45	4.27	3.03	11.7	2.62	301	62	62.9	24.6	33.7	0.92	39.3	41.7	22.6	104.2	29.9	25.4	1	0
1	38	2	2	2	2	1	115	78	1	0	8.2	135.17	3.06	1.32	0.93	1.58	2.8	12.8	1.16	322	38	59.6	21.9	28.9	0.92	39.7	42.3	22.9	79.7	28.7	24.8	0	0
1	65	26	2	2	1	1	140	68	1	1	6.7	107.5	4.99	1.73	1.36	2.54	2.65	11.3	2.86	265	65	62.5	23.8	36.3	0.93	37.4	39.8	21.1	124	29.1	24.5	0	0
0	59	13	2	2	2	1	156	100	1	1	6.7	101.07	5.07	1.73	1.29	2.94	3.45	13.6	2.91	228	59	97.5	38.6	51.4	1.01	44.7	47.4	25.8	238.8	40.4	31.4	1	1
0	62	9	1	2	1	1	103	77	1	0	11	111.76	4.02	2.39	0.85	2.09	3.08	12.8	4.73	297	62	69.3	25.5	40.7	1	38.7	41.1	21.9	162.2	32	27.1	1	0
0	41	4	2	2	2	2	107	71	0	0	6.5	112.67	5.26	1.51	1.08	3.03	2.65	10.8	1.51	282	41	62.7	27.5	37	0.87	37.3	39.5	21.5	109.4	32.7	27.3	1	0
1	58	7	2	2	2	1	139	92	1	1	8.8	88.37	3.39	3.11	0.86	1.51	2.76	10.85	2.66	531	58	59.3	23.2	27.2	0.88	40.7	43.2	23.5	71.6	28.9	25.1	0	0
0	47	9	2	2	2	2	136	83	0	1	7.5	120.11	5.95	4.79	1.45	2.97	3.07	13	3.92	414	47	68.6	27.5	36	0.93	41.3	43.9	23.5	128.5	32.1	27.1	1	0
0	39	13	2	2	2	2	109	81	1	1	9.7	109.26	5.22	4.48	1.02	2.52	2.71	14.9	2.39	618	39	73.3	24.2	26.1	0.89	51	54.2	29.7	87.5	30.6	27	1	0
0	57	1	2	2	2	2	137	85	0	0	6.1	100.59	6.01	1.36	1.39	3.78	2.88	14	4.26	240	57	72	33.3	47.7	0.89	35.6	37.7	20	178.5	34.8	27.5	1	1
1	61	4	2	2	2	1	145	80	0	1	5.9	48.63	4.91	1.17	1.12	3.17	2.83	10.8	1.23	356.2	61	62.3	23.7	29.9	0.87	41.2	43.7	23.3	86	28.9	25.1	0	0
1	80	17	2	2	1	1	125	80	0	1	7.9	85.9	3.85	1.3	0.97	2.22	3.23	13.4	2.9	289.5	80	67.8	26.5	42.4	0.99	36.8	39.1	20.8	166	32.7	27.3	1	0
1	61	8	2	2	1	1	155	105	1	1	8.2	98.41	4.47	1.25	1.02	2.37	2.77	15	2.91	372	61	63.4	24.2	29.4	0.87	42.3	44.8	24.4	79.3	29.7	25.6	1	0
1	68	3	2	2	1	1	156	97	1	0	6.5	96.11	5.1	1.35	1.16	3.24	3.43	12.6	1.81	232	68	67.5	30	43.1	0.95	36.2	38.4	20.8	157.1	34.3	27.9	1	1
1	53	17	2	2	1	1	119	70	1	1	8	77.17	3.93	1.32	1.26	1.77	3.4	13.25	3.13	460	53	57.6	23.1	32.4	0.88	36.7	38.9	20.6	94.7	27.9	24	0	0
1	70	21	2	2	1	1	118	68	1	1	7.2	85.32	5	1.33	1.06	2.9	2.91	9.82	3.23	405	70	72.1	28.2	42.5	0.99	39.1	41.5	22	173.9	32.7	27.2	1	1
1	63	13	2	2	1	1	130	67	1	1	6.3	74.29	5.64	1.47	1.45	3.37	2.96	15.6	1.21	338	63	56.3	24.7	38	0.92	32.9	34.9	18.4	120.4	29.9	25	1	0
1	65	12	2	2	2	1	143	96	1	1	14.8	103.9	4.92	1.53	0.94	2.94	2.29	10.1	5.21	205	65	46.9	20.8	22.5	0.83	34.1	36.3	18.9	58	26.8	24.2	0	0
1	66	22	2	2	1	1	152	80	1	1	12.5	46.06	6.26	2.54	1.2	3.65	2.39	14.7	2.93	576	66	63.1	25.6	39.4	0.95	36	38.2	20.5	137.6	31.9	26.8	1	0
1	66	18	2	2	2	1	152	81	1	1	8.2	103.39	3.88	2.04	1.29	1.36	3.11	13.8	0.541	305	66	61.3	24.6	33.3	0.93	38.4	40.9	21.9	103.8	30.4	25.9	1	0
1	53	10	2	2	1	2	134	72	1	1	6.5	99.93	6.78	4.07	1.47	3.67	2.63	10.7	5.07	421	53	72.4	27.6	36.6	0.94	43.2	45.9	25.3	129.1	32.9	27.3	1	0
1	71	10	2	2	1	1	154	90	1	1	7.6	34.26	5.3	1.97	1.16	2.58	2.66	14.8	3.26	355	71	73.4	27.6	34.8	0.99	45.1	47.9	25.7	137.7	32	26.9	1	0
1	45	6	2	2	2	2	145	89	1	0	12.1	114.56	5.57	1.28	1.15	3.32	2.53	13.8	1.16	367	45	58.6	23.8	33.7	0.92	36.5	38.9	20.6	104	29	24.6	0	0
1	58	1	2	2	1	1	146	86	0	0	7.2	105.3	3.23	1.66	1.24	1.1	3.28	12.4	2.03	293	58	60	24	30.1	0.88	39.6	42	22.9	75	29.7	25.6	1	0
1	37	5	2	2	2	1	139	96	1	0	10	118.12	3.84	1.36	0.79	2.16	3.48	14.2	1.75	226.2	37	65.9	24.2	31	0.94	43	45.5	25.2	89.9	31.5	27.3	1	0
1	66	17	2	2	1	1	135	91	1	0	7.6	85.09	5.15	1.55	1.59	2.67	3.05	12.4	4.18	265	66	77.2	28.4	39.6	0.96	43.8	46.6	25	162.3	33	27.5	1	1
1	69	20	2	2	1	2	140	82	1	0	9.4	90.19	5	7.64	1.07	1.81	2.66	13.3	2.06	429	69	66.2	28.3	38.4	0.91	38.5	40.8	21.8	134.1	32.2	26.9	1	1
1	76	15	2	2	2	1	150	88	1	1	11.3	42.93	5.72	3.17	1.21	2.64	2.88	14.2	2.98	563	76	55.3	25.9	36.3	0.91	33.3	35.2	18.8	106.4	31	26.1	1	0
1	59	5	2	2	1	1	137	88	1	0	6.2	107.74	3.98	9.74	0.72	1.96	2.86	15.3	1.39	351	59	75.5	27.1	41.9	1	41.3	43.9	23.5	175.2	31.2	25.3	1	0
1	61	3	2	2	2	1	123	80	1	0	7	95.53	5	1.45	1.2	3	2.73	14.4	1.24	370	61	70.5	28.2	43.9	1.03	37.2	39.6	21.2	180.8	33.4	27.3	1	1
1	51	22	2	2	1	2	130	90	1	0	8.9	105.57	4.87	1.45	1.31	2.74	2.64	14.5	1.13	341	51	61.9	23.3	32	0.91	39.6	42.1	22.8	92.3	29.6	25.4	0	0
1	57	11	2	2	1	2	147	91	1	1	7.6	105.99	4.25	1.1	1.2	2.26	2.98	13.7	1.47	294	57	65.5	23.8	34.1	0.97	40.7	43.2	23.5	113.4	30.5	25.9	0	0
1	56	13	2	2	1	1	151	84	1	1	6.4	103.22	3.67	1.6	0.9	2.06	3.76	11.8	3.91	283	56	76.9	30.8	41.3	0.98	42.5	45.1	24.3	170	34.2	28.1	1	1
1	57	8	2	2	1	1	153	91	1	1	7.7	112.92	5.34	0.94	1.63	2.72	2.91	12.6	4.26	232	57	63.4	21.2	28.8	0.89	42.4	45.1	23.9	89.4	27.5	24.1	0	0
1	68	16	2	2	1	2	160	90	1	1	8.9	63.36	6.56	0.77	2.31	2.89	2.56	10.5	5.05	255	68	54.5	23.3	23.8	0.71	39.2	41.5	21.5	61.9	26.5	23.8	0	0
0	64	15	2	2	2	2	126	78	1	1	11.4	98.18	5.62	1.28	1.19	3.01	2.32	13.25	2.61	172	64	48.4	23.3	34.3	0.89	29.9	31.8	16.3	96.8	27.9	23.5	0	0
0	58	3	2	2	1	2	127	82	0	1	6.7	97.57	3.92	1.84	0.98	2.37	2.69	15.2	1.87	279	58	64.6	22.6	27.5	0.89	44.2	46.9	25.6	80	29.9	26.4	0	0
0	35	1	2	2	2	2	107	69	0	0	10.7	123.76	5.73	2.41	0.91	3.99	2.76	10.1	3.26	417	35	76.3	31	43.1	1	40.9	43.4	23.9	173.2	35.8	29.2	1	1
0	66	18	2	2	1	2	124	74	1	0	6.8	90.08	4.05	1.02	1.27	1.74	2.85	10.6	2.73	341	66	47.7	19.9	27.4	0.85	32.7	34.6	18.2	62.5	25.5	22.2	0	0
0	43	7	2	2	2	1	134	84	0	1	10.1	127.11	4.66	6	0.95	2.09	2.51	12.9	2.69	113	43	60.8	23.8	33.1	0.88	38.3	40.7	22	93.1	29.6	25.2	0	0
0	56	3	2	2	2	2	128	74	0	1	12.08	108.36	5.83	1.71	1.25	3.64	2.52	13.8	3.04	297	56	59.9	24.6	34	0.88	37.2	39.5	21.4	96.2	30.2	25.5	1	0
0	34	6	2	2	2	1	102	72	1	1	7	141.92	5.63	5.33	0.87	2.9	2.99	10.6	2.73	419	34	64.6	28.7	37.2	0.86	38.2	40.6	22	114.9	32	26.2	1	1
0	47	1	2	2	2	1	128	78	1	0	8.5	117.21	3.38	1.72	0.99	1.8	2.64	13.2	2.27	178	47	66.2	24.9	28.1	0.9	44.8	47.6	26.2	80.8	30.8	26.6	1	0
0	62	23	2	2	1	1	143	87	0	1	9.2	77.34	4.28	2.74	1.02	2.15	2.67	13.2	1.3	293	62	56	21.9	27.2	0.88	38.5	40.8	21.8	73.1	28.3	25.2	0	0
0	38	6	2	2	2	1	139	84	0	0	7.8	106.82	2.89	1.36	0.86	1.12	3.06	12.3	2.72	253	38	61.6	24.1	30.5	0.9	40.4	42.8	23	88.3	29.5	25.5	1	0
0	55	2	2	2	2	2	113	80	1	1	6.9	76.78	6.92	1.95	1.97	3.29	2.88	12	4.44	275	55	51.5	18.5	27	0.84	35.4	37.6	20.2	57.6	25.5	22.2	0	0
0	33	6	2	2	2	1	125	97	0	0	12.5	137.32	4.71	2.39	1.01	3.11	3.2	14.6	1.45	264	33	63.2	25	37.2	0.91	37.3	39.7	21.5	119	31	25.9	1	0
0	64	7	2	2	1	2	126	80	1	0	6.3	59.83	2.51	1.58	0.87	0.9	2.81	13.5	3.54	377	64	74.7	29.2	44	1.02	39.4	41.9	22.6	183.2	34.9	28.6	1	1
0	69	14	2	2	1	1	150	73	1	1	8.3	90.99	4.77	1.25	1.06	2.88	3.28	12.7	3.1	281.7	69	56.3	23.4	36.1	0.94	34	36	19.1	111.8	29.4	25	0	0
0	51	5	2	2	1	2	129	83	1	0	6.3	106.88	4.49	1.76	1.18	1.93	2.86	11.3	3.55	280	51	68.9	22.2	24.1	0.86	49.2	52.3	28.3	78.8	28.1	24.7	0	0
0	61	2	2	2	2	2	121	82	0	0	12.5	109.02	5.17	1.36	1.18	2.8	2.43	10.4	6.06	319	61	50.9	21.7	35.5	0.95	30.9	32.8	17.2	103.9	28.1	23.8	0	0
0	66	11	2	2	1	1	145	84	1	0	13	92.24	5.05	1.38	1.72	2.13	2.44	12.7	1.54	283	66	54.6	21.9	25.6	0.85	38.3	40.6	21.5	69.2	27.3	24.1	0	0
0	40	12	2	2	2	2	123	85	0	1	9.1	127.4	3.97	0.93	1.02	2.13	3.31	15.6	0.981	238	40	53.8	22.4	39.2	0.83	30.6	32.7	16.9	116.9	26.9	22.3	0	0
0	57	15	2	2	1	1	134	91	1	0	7.8	96.48	5.22	1.75	1.13	2.91	2.64	14.2	2.47	322	57	74.7	29.9	42.1	0.96	40.7	43.2	23	171.9	32.5	26.7	1	1
0	56	26	2	2	2	2	135	75	1	1	8	99.86	4.58	1.19	1.27	2.42	2.72	12.7	3.75	399.4	56	66.7	27.4	40.1	0.98	37.7	40	21.5	149.3	32.7	27.2	1	0
0	61	12	2	2	1	2	158	73	0	1	7.7	98.41	4.3	4.11	1.04	1.58	3.19	13.2	1.52	294	61	66.2	25.9	33.9	0.9	41.2	43.7	23.8	106.6	31.3	26.5	1	0
0	62	22	2	2	1	1	133	78	1	1	10.9	100.96	3.26	0.76	1.06	1.47	2.95	13.9	1.57	287	62	62.4	22.4	27.4	0.91	42.7	45.3	24.5	82.3	28.9	25.3	0	0
1	48	1	2	2	1	2	114	84	0	0	8.5	117.32	6.34	2.61	1.41	3.25	3.32	13.1	7.04	440	48	74.9	29.6	45	0.99	38.8	41.2	22.1	186.4	34.5	28.3	1	1
0	44	22	2	2	1	1	149	83	1	1	7.2	122.67	3.75	0.88	1.16	1.77	2.58	12.8	1.7	241	44	60.2	25.1	33.4	0.91	37.8	40.1	21.6	98	31.2	26.7	1	0

## Sheet: Sheet2
Smoking	Drinking	ASCVD(%)	History of DM	Metformin	Insulin
1	1	1	1	0	0
2	2	2	2	1	1
